# Supplementary material for: Common genetic variants contribute to heritability of age at onset of schizophrenia
Source: Research Square preprint supplement (doi:10.21203/rs.3.rs-2487478/v1), 2023-01-23
Supplement: Supplementary file 1 [file 42ebb391c798ba75e5310825.xlsx]

## Sheet: Table_S1
Table S1. Summary statistics used to evaluate genetic correlation estimates with AAO in SCZ.
Phenotype	pubMed ID link	Source
Schizophrenia (SCZ)	23974872	Psychiatric Genomics Consortium (PGC): https://figshare.com/articles/dataset/scz2013sweden/14672154
Bipolar disorder (BD)	34002096	PGC: https://figshare.com/articles/dataset/PGC3_bipolar_disorder_GWAS_summary_statistics/14102594
Major depressive disorder (MDD)	30718901	PGC: https://datashare.ed.ac.uk/handle/10283/3203
Attention-deficit/hyperactivity disorder (ADHD)	30478444	PGC: https://figshare.com/articles/dataset/adhd2019/14671965
Autism spectrum disorder (ASD)	30804558	PGC: https://figshare.com/articles/dataset/asd2019/14671989
Obsessive Compulsive Disorder (OCD)	28761083	PGC: https://figshare.com/articles/dataset/ocd2018/14672103
Cannabis use disorder (CUD)	33096046	PGC: https://figshare.com/articles/dataset/sud2020-cud/14842692
Neuroticism	27089181	Social Science Genetic Association Consortium (SSGAC): http://ssgac.org/documents/Neuroticism_Full.txt.gz
Educational attainment (EA)	30038396	SSGAC: https://www.dropbox.com/s/ho58e9jmytmpaf8/GWAS_EA_excl23andMe.txt?dl=1
Childhood maltreatment	33740410	Apollo - University of Cambridge Repository: https://www.repository.cam.ac.uk/handle/1810/318326

## Sheet: Table_S2
Table S2. Results of enrichments identified with KOBAS-i.
## Databases: PANTHER, KEGG pathway, Reactome and BioCyc databases.
##Statistical test method: hypergeometric test / Fisher's exact test
##FDR correction method: Benjamini and Hochberg
Term	Database	ID	Input number	Background number	P-Value	Corrected P-Value	Input	Hyperlink
Transport of small molecules	Reactome	R-HSA-382551	13	720	2.51684e-05	0.017039	MBTPS1|SKP1|FTMT|SLC22A5|PRKAR2B|SLC26A4|SLC26A3|ATP2C2|SLC18A1|ATP6V1B2|SAR1B|VDAC1|SLC35C1	http://www.reactome.org/cgi-bin/eventbrowser_st_id?ST_ID=R-HSA-382551
Vesicle-mediated transport	Reactome	R-HSA-5653656	12	669	5.51792e-05	0.0183363	SYT8|HPR|HP|COG5|COG4|DENND5B|SEC24A|MAN2A1|TBC1D1|SAR1B|KIF2B|KIF3A	http://www.reactome.org/cgi-bin/eventbrowser_st_id?ST_ID=R-HSA-5653656
Olfactory Signaling Pathway	Reactome	R-HSA-381753	9	393	8.12539e-05	0.0183363	OR4K5|OR4K1|OR4L1|OR4N2|OR4K2|OR4N5|OR4K14|OR4K17|OR4K13	http://www.reactome.org/cgi-bin/eventbrowser_st_id?ST_ID=R-HSA-381753
Metabolism	Reactome	R-HSA-1430728	22	2075	0.000150843	0.0255301	MSMO1|RFC1|NAMPT|UQCRQ|PRKAR2B|VDAC1|TAT|PIK3CG|TH|HSD17B4|EXT2|UGDH|SUCLG1|SEC24A|DDC|SAR1B|CSGALNACT1|MBTPS1|PPP2CA|VAC14|SLC22A5|COX11	http://www.reactome.org/cgi-bin/eventbrowser_st_id?ST_ID=R-HSA-1430728
Olfactory transduction	KEGG PATHWAY	hsa04740	9	448	0.000212041	0.0261213	OR4K5|OR4K1|OR4L1|OR4N2|OR4K2|OR4N5|OR4K14|OR4K17|OR4K13	http://www.genome.jp/kegg-bin/show_pathway?hsa04740/hsa:79317%09red/hsa:122742%09red/hsa:390429%09red/hsa:390437%09red/hsa:390436%09red/hsa:390431%09red/hsa:390433%09red/hsa:122740%09red/hsa:79544%09red
Metabolic pathways	KEGG PATHWAY	hsa01100	17	1433	0.000252444	0.0261213	TAT|MSMO1|EXT2|UGDH|NAMPT|MAN2A1|PIK3CG|DDC|PCBD2|SUCLG1|TH|ALG10|COX11|ATP6V1B2|UQCRQ|HSD17B4|CSGALNACT1	http://www.genome.jp/kegg-bin/show_pathway?hsa01100/hsa:8802%09red/hsa:55790%09red/hsa:1644%09red/hsa:84105%09red/hsa:1353%09red/hsa:7358%09red/hsa:27089%09red/hsa:6898%09red/hsa:5294%09red/hsa:2132%09red/hsa:10135%09red/hsa:84920%09red/hsa:4124%09red/hsa:526%09red/hsa:7054%09red/hsa:6307%09red/hsa:3295%09red
MHC class II antigen presentation	Reactome	R-HSA-2132295	5	123	0.000270088	0.0261213	CTSD|SAR1B|KIF2B|SEC24A|KIF3A	http://www.reactome.org/cgi-bin/eventbrowser_st_id?ST_ID=R-HSA-2132295
Adrenaline and noradrenaline biosynthesis	PANTHER	P00001	3	27	0.000314399	0.026606	DDC|SLC18A1|TH	http://www.pantherdb.org/pathway/pathwayDiagram.jsp?catAccession=P00001
Asparagine N-linked glycosylation	Reactome	R-HSA-446203	7	304	0.000491065	0.0338652	COG5|COG4|SEC24A|MAN2A1|ALG10|SAR1B|SLC35C1	http://www.reactome.org/cgi-bin/eventbrowser_st_id?ST_ID=R-HSA-446203
Parkinson disease	KEGG PATHWAY	hsa05012	5	142	0.000509713	0.0338652	SLC18A1|VDAC1|TH|SNCAIP|UQCRQ	http://www.genome.jp/kegg-bin/show_pathway?hsa05012/hsa:7054%09red/hsa:6570%09red/hsa:7416%09red/hsa:9627%09red/hsa:27089%09red
Metabolism of steroids	Reactome	R-HSA-8957322	5	147	0.000593298	0.0338652	MSMO1|HSD17B4|SAR1B|SEC24A|MBTPS1	http://www.reactome.org/cgi-bin/eventbrowser_st_id?ST_ID=R-HSA-8957322
Membrane Trafficking	Reactome	R-HSA-199991	10	631	0.00060027	0.0338652	SYT8|TBC1D1|COG5|COG4|DENND5B|SEC24A|MAN2A1|SAR1B|KIF3A|KIF2B	http://www.reactome.org/cgi-bin/eventbrowser_st_id?ST_ID=R-HSA-199991
Tyrosine metabolism	KEGG PATHWAY	hsa00350	3	36	0.000687376	0.0357964	TAT|DDC|TH	http://www.genome.jp/kegg-bin/show_pathway?hsa00350/hsa:7054%09red/hsa:6898%09red/hsa:1644%09red
G alpha (s) signalling events	Reactome	R-HSA-418555	9	536	0.000754439	0.0364825	OR4K5|OR4K1|OR4L1|OR4N2|OR4K2|OR4N5|OR4K14|OR4K17|OR4K13	http://www.reactome.org/cgi-bin/eventbrowser_st_id?ST_ID=R-HSA-418555
Signal Transduction	Reactome	R-HSA-162582	24	2689	0.000892912	0.0403001	OR4K5|OR4K1|OR4K2|PRKAR2B|KIF2B|SKP1|PIK3CG|OR4L1|ATP6V1B2|FGD4|TCF7|OR4N2|CTSD|OR4N5|RHOH|FER|KIF3A|PPP2CA|NOG|OR4K14|OR4K17|OR4K13|GFRA2|HLF	http://www.reactome.org/cgi-bin/eventbrowser_st_id?ST_ID=R-HSA-162582
SLC transporter disorders	Reactome	R-HSA-5619102	4	96	0.00103417	0.0413379	SLC22A5|SLC26A3|SLC26A4|SLC35C1	http://www.reactome.org/cgi-bin/eventbrowser_st_id?ST_ID=R-HSA-5619102
Multifunctional anion exchangers	Reactome	R-HSA-427601	2	9	0.00103803	0.0413379	SLC26A3|SLC26A4	http://www.reactome.org/cgi-bin/eventbrowser_st_id?ST_ID=R-HSA-427601
Intra-Golgi traffic	Reactome	R-HSA-6811438	3	44	0.00118845	0.0446988	COG5|MAN2A1|COG4	http://www.reactome.org/cgi-bin/eventbrowser_st_id?ST_ID=R-HSA-6811438
GPCR downstream signalling	Reactome	R-HSA-388396	13	1108	0.00149982	0.0517363	OR4K5|FGD4|OR4K1|OR4L1|PPP2CA|OR4K2|OR4N5|OR4K14|OR4K17|PRKAR2B|OR4K13|OR4N2|PIK3CG	http://www.reactome.org/cgi-bin/eventbrowser_st_id?ST_ID=R-HSA-388396
Cocaine addiction	KEGG PATHWAY	hsa05030	3	49	0.00159383	0.0517363	DDC|SLC18A1|TH	http://www.genome.jp/kegg-bin/show_pathway?hsa05030/hsa:7054%09red/hsa:6570%09red/hsa:1644%09red
Transport to the Golgi and subsequent modification	Reactome	R-HSA-948021	5	185	0.00160482	0.0517363	SAR1B|SEC24A|COG5|MAN2A1|COG4	http://www.reactome.org/cgi-bin/eventbrowser_st_id?ST_ID=R-HSA-948021
Dopamine receptor mediated signaling pathway	PANTHER	P05912	3	51	0.00177734	0.0546935	DDC|PRKAR2B|TH	http://www.pantherdb.org/pathway/pathwayDiagram.jsp?catAccession=P05912
Scavenging of heme from plasma	Reactome	R-HSA-2168880	2	13	0.00195881	0.0556695	HPR|HP	http://www.reactome.org/cgi-bin/eventbrowser_st_id?ST_ID=R-HSA-2168880
Regulation of cholesterol biosynthesis by SREBP (SREBF)	Reactome	R-HSA-1655829	3	53	0.00197351	0.0556695	SAR1B|SEC24A|MBTPS1	http://www.reactome.org/cgi-bin/eventbrowser_st_id?ST_ID=R-HSA-1655829
Intra-Golgi and retrograde Golgi-to-ER traffic	Reactome	R-HSA-6811442	5	202	0.00233047	0.0624075	COG4|KIF2B|COG5|MAN2A1|KIF3A	http://www.reactome.org/cgi-bin/eventbrowser_st_id?ST_ID=R-HSA-6811442
Signaling by GPCR	Reactome	R-HSA-372790	13	1170	0.00239674	0.0624075	OR4K5|FGD4|OR4K1|OR4L1|PPP2CA|OR4K2|OR4N5|OR4K14|OR4K17|PRKAR2B|OR4K13|OR4N2|PIK3CG	http://www.reactome.org/cgi-bin/eventbrowser_st_id?ST_ID=R-HSA-372790
Iron uptake and transport	Reactome	R-HSA-917937	3	58	0.00252133	0.0632201	ATP6V1B2|FTMT|SKP1	http://www.reactome.org/cgi-bin/eventbrowser_st_id?ST_ID=R-HSA-917937
Assembly of collagen fibrils and other multimeric structures	Reactome	R-HSA-2022090	3	60	0.00276415	0.0668333	LOX|COL14A1|BMP1	http://www.reactome.org/cgi-bin/eventbrowser_st_id?ST_ID=R-HSA-2022090
Dopaminergic synapse	KEGG PATHWAY	hsa04728	4	131	0.00309781	0.0711592	DDC|PPP2CA|SLC18A1|TH	http://www.genome.jp/kegg-bin/show_pathway?hsa04728/hsa:7054%09red/hsa:6570%09red/hsa:5515%09red/hsa:1644%09red
Phenylalanine metabolism	KEGG PATHWAY	hsa00360	2	17	0.00315329	0.0711592	TAT|DDC	http://www.genome.jp/kegg-bin/show_pathway?hsa00360/hsa:6898%09red/hsa:1644%09red
Metabolism of amine-derived hormones	Reactome	R-HSA-209776	2	18	0.00349352	0.0739098	DDC|TH	http://www.reactome.org/cgi-bin/eventbrowser_st_id?ST_ID=R-HSA-209776
Crosslinking of collagen fibrils	Reactome	R-HSA-2243919	2	18	0.00349352	0.0739098	LOX|BMP1	http://www.reactome.org/cgi-bin/eventbrowser_st_id?ST_ID=R-HSA-2243919
Amphetamine addiction	KEGG PATHWAY	hsa05031	3	68	0.00387729	0.0757632	DDC|SLC18A1|TH	http://www.genome.jp/kegg-bin/show_pathway?hsa05031/hsa:7054%09red/hsa:6570%09red/hsa:1644%09red
Degradation of the extracellular matrix	Reactome	R-HSA-1474228	4	140	0.00390056	0.0757632	CTSD|COL14A1|BMP1|SPOCK3	http://www.reactome.org/cgi-bin/eventbrowser_st_id?ST_ID=R-HSA-1474228
Metabolism of proteins	Reactome	R-HSA-392499	18	2012	0.00391686	0.0757632	MRPL13|SNCAIP|MBTPS1|SFTPC|CTSD|MAN2A1|COG4|SKP1|YARS2|METTL20|SEC24A|COG5|UBE2B|ALG10|HLF|VDAC1|SAR1B|SLC35C1	http://www.reactome.org/cgi-bin/eventbrowser_st_id?ST_ID=R-HSA-392499
Circadian Clock	Reactome	R-HSA-400253	3	69	0.00403289	0.0758407	NAMPT|CRY2|SKP1	http://www.reactome.org/cgi-bin/eventbrowser_st_id?ST_ID=R-HSA-400253
Adherens junction	KEGG PATHWAY	hsa04520	3	72	0.00452228	0.0827455	TCF7|FER|CTNNA2	http://www.genome.jp/kegg-bin/show_pathway?hsa04520/hsa:1496%09red/hsa:6932%09red/hsa:2241%09red
p53 pathway	PANTHER	P00059	3	76	0.0052285	0.0931498	PPP2CA|CD82|PIK3CG	http://www.pantherdb.org/pathway/pathwayDiagram.jsp?catAccession=P00059
ER to Golgi Anterograde Transport	Reactome	R-HSA-199977	4	154	0.0054116	0.0938963	SAR1B|SEC24A|COG5|COG4	http://www.reactome.org/cgi-bin/eventbrowser_st_id?ST_ID=R-HSA-199977
SLC-mediated transmembrane transport	Reactome	R-HSA-425407	5	249	0.00554779	0.0938963	SLC22A5|SLC18A1|SLC26A3|SLC26A4|SLC35C1	http://www.reactome.org/cgi-bin/eventbrowser_st_id?ST_ID=R-HSA-425407
Degradation of beta-catenin by the destruction complex	Reactome	R-HSA-195253	3	81	0.00619971	0.0973929	PPP2CA|TCF7|SKP1	http://www.reactome.org/cgi-bin/eventbrowser_st_id?ST_ID=R-HSA-195253
Antigen Presentation: Folding, assembly and peptide loading of class I MHC	Reactome	R-HSA-983170	2	25	0.00632448	0.0973929	SAR1B|SEC24A	http://www.reactome.org/cgi-bin/eventbrowser_st_id?ST_ID=R-HSA-983170
Adaptive Immune System	Reactome	R-HSA-1280218	9	748	0.00672942	0.0973929	SKP1|PPP2CA|UBE2B|CTSD|SEC24A|SAR1B|PJA2|KIF3A|KIF2B	http://www.reactome.org/cgi-bin/eventbrowser_st_id?ST_ID=R-HSA-1280218
Folate biosynthesis	KEGG PATHWAY	hsa00790	2	26	0.00679134	0.0973929	PCBD2|TH	http://www.genome.jp/kegg-bin/show_pathway?hsa00790/hsa:7054%09red/hsa:84105%09red
DARPP-32 events	Reactome	R-HSA-180024	2	26	0.00679134	0.0973929	PPP2CA|PRKAR2B	http://www.reactome.org/cgi-bin/eventbrowser_st_id?ST_ID=R-HSA-180024
Protein processing in endoplasmic reticulum	KEGG PATHWAY	hsa04141	4	165	0.00684181	0.0973929	SAR1B|SKP1|SEC24A|MBTPS1	http://www.genome.jp/kegg-bin/show_pathway?hsa04141/hsa:51128%09red/hsa:10802%09red/hsa:6500%09red/hsa:8720%09red
Toll Like Receptor 5 (TLR5) Cascade	Reactome	R-HSA-168176	3	85	0.00704912	0.0973929	TLR10|PPP2CA|SKP1	http://www.reactome.org/cgi-bin/eventbrowser_st_id?ST_ID=R-HSA-168176
Toll Like Receptor 10 (TLR10) Cascade	Reactome	R-HSA-168142	3	85	0.00704912	0.0973929	TLR10|PPP2CA|SKP1	http://www.reactome.org/cgi-bin/eventbrowser_st_id?ST_ID=R-HSA-168142
MyD88 cascade initiated on plasma membrane	Reactome	R-HSA-975871	3	85	0.00704912	0.0973929	TLR10|PPP2CA|SKP1	http://www.reactome.org/cgi-bin/eventbrowser_st_id?ST_ID=R-HSA-975871
Disease	Reactome	R-HSA-1643685	11	1049	0.00770519	0.100619	EXT2|SFTPC|PPP2CA|SKP1|TLR10|SLC22A5|SLC26A3|SLC26A4|CBLL1|TAF2|SLC35C1	http://www.reactome.org/cgi-bin/eventbrowser_st_id?ST_ID=R-HSA-1643685
Nicotine pharmacodynamics pathway	PANTHER	P06587	2	28	0.00777044	0.100619	DDC|TH	http://www.pantherdb.org/pathway/pathwayDiagram.jsp?catAccession=P06587
Disorders of transmembrane transporters	Reactome	R-HSA-5619115	4	172	0.0078709	0.100619	SLC22A5|SLC26A3|SLC26A4|SLC35C1	http://www.reactome.org/cgi-bin/eventbrowser_st_id?ST_ID=R-HSA-5619115
Collagen formation	Reactome	R-HSA-1474290	3	89	0.00796425	0.100619	LOX|COL14A1|BMP1	http://www.reactome.org/cgi-bin/eventbrowser_st_id?ST_ID=R-HSA-1474290
The citric acid (TCA) cycle and respiratory electron transport	Reactome	R-HSA-1428517	4	173	0.00802574	0.100619	COX11|VDAC1|SUCLG1|UQCRQ	http://www.reactome.org/cgi-bin/eventbrowser_st_id?ST_ID=R-HSA-1428517
TGF-beta signaling pathway	KEGG PATHWAY	hsa04350	3	94	0.00920228	0.112389	PPP2CA|NOG|SKP1	http://www.genome.jp/kegg-bin/show_pathway?hsa04350/hsa:9241%09red/hsa:6500%09red/hsa:5515%09red
Circadian rhythm	KEGG PATHWAY	hsa04710	2	31	0.00935046	0.112389	CRY2|SKP1	http://www.genome.jp/kegg-bin/show_pathway?hsa04710/hsa:1408%09red/hsa:6500%09red
Antimicrobial peptides	Reactome	R-HSA-6803157	3	95	0.00946258	0.112389	REG3G|LEAP2|REG3A	http://www.reactome.org/cgi-bin/eventbrowser_st_id?ST_ID=R-HSA-6803157
Adherens junctions interactions	Reactome	R-HSA-418990	2	32	0.00990628	0.11563	ANG|RNASE4	http://www.reactome.org/cgi-bin/eventbrowser_st_id?ST_ID=R-HSA-418990
Cargo concentration in the ER	Reactome	R-HSA-5694530	2	33	0.0104764	0.120213	SAR1B|SEC24A	http://www.reactome.org/cgi-bin/eventbrowser_st_id?ST_ID=R-HSA-5694530
Post-translational protein modification	Reactome	R-HSA-597592	13	1412	0.0109235	0.123253	UBE2B|MBTPS1|SKP1|MAN2A1|COG4|METTL20|SEC24A|COG5|ALG10|HLF|VDAC1|SAR1B|SLC35C1	http://www.reactome.org/cgi-bin/eventbrowser_st_id?ST_ID=R-HSA-597592
Extracellular matrix organization	Reactome	R-HSA-1474244	5	298	0.0113689	0.126176	CTSD|LOX|COL14A1|BMP1|SPOCK3	http://www.reactome.org/cgi-bin/eventbrowser_st_id?ST_ID=R-HSA-1474244
Striated Muscle Contraction	Reactome	R-HSA-390522	2	36	0.0122716	0.133998	TNNT3|TNNI2	http://www.reactome.org/cgi-bin/eventbrowser_st_id?ST_ID=R-HSA-390522
Immune System	Reactome	R-HSA-168256	17	2096	0.0125374	0.134728	SKP1|KIF2B|UBE2B|CTSD|TLR10|PPP2CA|IL4|LPL|SEC24A|LEAP2|GFRA2|REG3G|ATP6V1B2|PJA2|SAR1B|KIF3A|REG3A	http://www.reactome.org/cgi-bin/eventbrowser_st_id?ST_ID=R-HSA-168256
African trypanosomiasis	KEGG PATHWAY	hsa05143	2	37	0.0128978	0.136434	HPR|HP	http://www.genome.jp/kegg-bin/show_pathway?hsa05143/hsa:3250%09red
RET signaling	Reactome	R-HSA-8853659	2	39	0.014191	0.147805	DOK2|GFRA2	http://www.reactome.org/cgi-bin/eventbrowser_st_id?ST_ID=R-HSA-8853659
Hedgehog 'off' state	Reactome	R-HSA-5610787	3	112	0.0145503	0.149251	SKP1|PRKAR2B|KIF3A	http://www.reactome.org/cgi-bin/eventbrowser_st_id?ST_ID=R-HSA-5610787
Binding and Uptake of Ligands by Scavenger Receptors	Reactome	R-HSA-2173782	2	41	0.0155379	0.157002	HPR|HP	http://www.reactome.org/cgi-bin/eventbrowser_st_id?ST_ID=R-HSA-2173782
G1 Phase	Reactome	R-HSA-69236	2	43	0.0169373	0.164084	PPP2CA|SKP1	http://www.reactome.org/cgi-bin/eventbrowser_st_id?ST_ID=R-HSA-69236
Cyclin D associated events in G1	Reactome	R-HSA-69231	2	43	0.0169373	0.164084	PPP2CA|SKP1	http://www.reactome.org/cgi-bin/eventbrowser_st_id?ST_ID=R-HSA-69231
Metabolism of lipids	Reactome	R-HSA-556833	8	728	0.0169659	0.164084	MSMO1|MBTPS1|HSD17B4|PIK3CG|SLC22A5|SEC24A|SAR1B|VAC14	http://www.reactome.org/cgi-bin/eventbrowser_st_id?ST_ID=R-HSA-556833
5HT1 type receptor mediated signaling pathway	PANTHER	P04373	2	44	0.0176565	0.168358	SLC18A1|PRKAR2B	http://www.pantherdb.org/pathway/pathwayDiagram.jsp?catAccession=P04373
p53 pathway feedback loops 2	PANTHER	P04398	2	46	0.019133	0.179903	PPP2CA|PIK3CG	http://www.pantherdb.org/pathway/pathwayDiagram.jsp?catAccession=P04398
Transcription regulation by bZIP transcription factor	PANTHER	P00055	2	47	0.01989	0.18446	PRKAR2B|TAF2	http://www.pantherdb.org/pathway/pathwayDiagram.jsp?catAccession=P00055
Autophagy - animal	KEGG PATHWAY	hsa04140	3	128	0.0205075	0.185114	PPP2CA|CTSD|DEPTOR	http://www.genome.jp/kegg-bin/show_pathway?hsa04140/hsa:64798%09red/hsa:5515%09red/hsa:1509%09red
Oocyte meiosis	KEGG PATHWAY	hsa04114	3	128	0.0205075	0.185114	PPP2CA|PTTG2|SKP1	http://www.genome.jp/kegg-bin/show_pathway?hsa04114/hsa:10744%09red/hsa:5515%09red/hsa:6500%09red
Retrograde transport at the Trans-Golgi-Network	Reactome	R-HSA-6811440	2	49	0.0214413	0.190996	COG5|COG4	http://www.reactome.org/cgi-bin/eventbrowser_st_id?ST_ID=R-HSA-6811440
N-Glycan biosynthesis	KEGG PATHWAY	hsa00510	2	50	0.0222352	0.195496	ALG10|MAN2A1	http://www.genome.jp/kegg-bin/show_pathway?hsa00510/hsa:84920%09red/hsa:4124%09red
Oxidative phosphorylation	KEGG PATHWAY	hsa00190	3	133	0.0226048	0.196198	COX11|ATP6V1B2|UQCRQ	http://www.genome.jp/kegg-bin/show_pathway?hsa00190/hsa:526%09red/hsa:27089%09red/hsa:1353%09red
Pyruvate metabolism and Citric Acid (TCA) cycle	Reactome	R-HSA-71406	2	54	0.0255298	0.201534	VDAC1|SUCLG1	http://www.reactome.org/cgi-bin/eventbrowser_st_id?ST_ID=R-HSA-71406
Class I MHC mediated antigen processing & presentation	Reactome	R-HSA-983169	5	370	0.0258876	0.201534	SAR1B|PJA2|SEC24A|UBE2B|SKP1	http://www.reactome.org/cgi-bin/eventbrowser_st_id?ST_ID=R-HSA-983169
Phenylalanine, tyrosine and tryptophan biosynthesis	KEGG PATHWAY	hsa00400	1	5	0.0261964	0.201534	TAT	http://www.genome.jp/kegg-bin/show_pathway?hsa00400/hsa:6898%09red
Tyrosine catabolism	Reactome	R-HSA-8963684	1	5	0.0261964	0.201534	TAT	http://www.reactome.org/cgi-bin/eventbrowser_st_id?ST_ID=R-HSA-8963684
Serotonin and melatonin biosynthesis	Reactome	R-HSA-209931	1	5	0.0261964	0.201534	DDC	http://www.reactome.org/cgi-bin/eventbrowser_st_id?ST_ID=R-HSA-209931
@@serotonin and melatonin biosynthesis	BioCyc	PWY-6030	1	5	0.0261964	0.201534	DDC	http://biocyc.org/HUMAN/NEW-IMAGE?type=NIL&object=PWY-6030
PTK6 Expression	Reactome	R-HSA-8849473	1	5	0.0261964	0.201534	HLF	http://www.reactome.org/cgi-bin/eventbrowser_st_id?ST_ID=R-HSA-8849473
chondroitin biosynthesis	BioCyc	PWY-6566	1	5	0.0261964	0.201534	CSGALNACT1	http://biocyc.org/HUMAN/NEW-IMAGE?type=NIL&object=PWY-6566
tryptophan degradation via tryptamine	BioCyc	PWY-6307	1	5	0.0261964	0.201534	DDC	http://biocyc.org/HUMAN/NEW-IMAGE?type=NIL&object=PWY-6307
tyrosine degradation	BioCyc	TYRFUMCAT-PWY	1	5	0.0261964	0.201534	TAT	http://biocyc.org/HUMAN/NEW-IMAGE?type=NIL&object=TYRFUMCAT-PWY
Neurexins and neuroligins	Reactome	R-HSA-6794361	2	56	0.027247	0.207261	LRRTM1|NLGN1	http://www.reactome.org/cgi-bin/eventbrowser_st_id?ST_ID=R-HSA-6794361
Endometrial cancer	KEGG PATHWAY	hsa05213	2	58	0.0290094	0.218215	TCF7|CTNNA2	http://www.genome.jp/kegg-bin/show_pathway?hsa05213/hsa:1496%09red/hsa:6932%09red
Signaling by Hedgehog	Reactome	R-HSA-5358351	3	148	0.0295714	0.219998	SKP1|PRKAR2B|KIF3A	http://www.reactome.org/cgi-bin/eventbrowser_st_id?ST_ID=R-HSA-5358351
Kinesins	Reactome	R-HSA-983189	2	59	0.0299073	0.220079	KIF2B|KIF3A	http://www.reactome.org/cgi-bin/eventbrowser_st_id?ST_ID=R-HSA-983189
GDP-fucose biosynthesis	Reactome	R-HSA-6787639	1	6	0.0304957	0.221995	SLC35C1	http://www.reactome.org/cgi-bin/eventbrowser_st_id?ST_ID=R-HSA-6787639
Cadherin signaling pathway	PANTHER	P00012	3	153	0.0321175	0.224223	PCDH20|FER|CTNNA2	http://www.pantherdb.org/pathway/pathwayDiagram.jsp?catAccession=P00012
Hippo signaling pathway	KEGG PATHWAY	hsa04390	3	154	0.03264	0.224223	PPP2CA|TCF7|CTNNA2	http://www.genome.jp/kegg-bin/show_pathway?hsa04390/hsa:1496%09red/hsa:6932%09red/hsa:5515%09red
Toll-like Receptor Cascades	Reactome	R-HSA-168898	3	154	0.03264	0.224223	TLR10|PPP2CA|SKP1	http://www.reactome.org/cgi-bin/eventbrowser_st_id?ST_ID=R-HSA-168898
Cell-cell junction organization	Reactome	R-HSA-421270	2	63	0.0336075	0.224223	ANG|RNASE4	http://www.reactome.org/cgi-bin/eventbrowser_st_id?ST_ID=R-HSA-421270
Collagen degradation	Reactome	R-HSA-1442490	2	64	0.0345592	0.224223	CTSD|COL14A1	http://www.reactome.org/cgi-bin/eventbrowser_st_id?ST_ID=R-HSA-1442490
MAP kinase activation	Reactome	R-HSA-450294	2	64	0.0345592	0.224223	PPP2CA|SKP1	http://www.reactome.org/cgi-bin/eventbrowser_st_id?ST_ID=R-HSA-450294
Angiogenesis	PANTHER	P00005	3	158	0.0347746	0.224223	DOK2|TCF7|PIK3CG	http://www.pantherdb.org/pathway/pathwayDiagram.jsp?catAccession=P00005
TYSND1 cleaves peroxisomal proteins	Reactome	R-HSA-9033500	1	7	0.0347761	0.224223	HSD17B4	http://www.reactome.org/cgi-bin/eventbrowser_st_id?ST_ID=R-HSA-9033500
Defective CSF2RA causes pulmonary surfactant metabolism dysfunction 4 (SMDP4)	Reactome	R-HSA-5688890	1	7	0.0347761	0.224223	SFTPC	http://www.reactome.org/cgi-bin/eventbrowser_st_id?ST_ID=R-HSA-5688890
PP2A-mediated dephosphorylation of key metabolic factors	Reactome	R-HSA-163767	1	7	0.0347761	0.224223	PPP2CA	http://www.reactome.org/cgi-bin/eventbrowser_st_id?ST_ID=R-HSA-163767
Beta-oxidation of pristanoyl-CoA	Reactome	R-HSA-389887	1	7	0.0347761	0.224223	HSD17B4	http://www.reactome.org/cgi-bin/eventbrowser_st_id?ST_ID=R-HSA-389887
Defective CSF2RB causes pulmonary surfactant metabolism dysfunction 5 (SMDP5)	Reactome	R-HSA-5688849	1	7	0.0347761	0.224223	SFTPC	http://www.reactome.org/cgi-bin/eventbrowser_st_id?ST_ID=R-HSA-5688849
Regulation of TP53 Activity	Reactome	R-HSA-5633007	3	159	0.0353193	0.224747	TTC5|PPP2CA|TAF2	http://www.reactome.org/cgi-bin/eventbrowser_st_id?ST_ID=R-HSA-5633007
Plasma lipoprotein assembly, remodeling, and clearance	Reactome	R-HSA-174824	2	65	0.0355212	0.224747	SAR1B|MBTPS1	http://www.reactome.org/cgi-bin/eventbrowser_st_id?ST_ID=R-HSA-174824
Collagen biosynthesis and modifying enzymes	Reactome	R-HSA-1650814	2	67	0.0374762	0.23388	COL14A1|BMP1	http://www.reactome.org/cgi-bin/eventbrowser_st_id?ST_ID=R-HSA-1650814
COPII-mediated vesicle transport	Reactome	R-HSA-204005	2	68	0.0384689	0.23388	SAR1B|SEC24A	http://www.reactome.org/cgi-bin/eventbrowser_st_id?ST_ID=R-HSA-204005
Interleukin-18 signaling	Reactome	R-HSA-9012546	1	8	0.0390376	0.23388	IL4	http://www.reactome.org/cgi-bin/eventbrowser_st_id?ST_ID=R-HSA-9012546
Beta-oxidation of very long chain fatty acids	Reactome	R-HSA-390247	1	8	0.0390376	0.23388	HSD17B4	http://www.reactome.org/cgi-bin/eventbrowser_st_id?ST_ID=R-HSA-390247
RUNX3 regulates WNT signaling	Reactome	R-HSA-8951430	1	8	0.0390376	0.23388	TCF7	http://www.reactome.org/cgi-bin/eventbrowser_st_id?ST_ID=R-HSA-8951430
Binding of TCF/LEF:CTNNB1 to target gene promoters	Reactome	R-HSA-4411364	1	8	0.0390376	0.23388	TCF7	http://www.reactome.org/cgi-bin/eventbrowser_st_id?ST_ID=R-HSA-4411364
Factors involved in megakaryocyte development and platelet production	Reactome	R-HSA-983231	3	168	0.0404189	0.240032	KIF2B|PRKAR2B|KIF3A	http://www.reactome.org/cgi-bin/eventbrowser_st_id?ST_ID=R-HSA-983231
Interleukin-17 signaling	Reactome	R-HSA-448424	2	72	0.0425383	0.242156	PPP2CA|SKP1	http://www.reactome.org/cgi-bin/eventbrowser_st_id?ST_ID=R-HSA-448424
Translocation of SLC2A4 (GLUT4) to the plasma membrane	Reactome	R-HSA-1445148	2	72	0.0425383	0.242156	TBC1D1|KIF3A	http://www.reactome.org/cgi-bin/eventbrowser_st_id?ST_ID=R-HSA-1445148
Diseases associated with surfactant metabolism	Reactome	R-HSA-5687613	1	9	0.0432805	0.242156	SFTPC	http://www.reactome.org/cgi-bin/eventbrowser_st_id?ST_ID=R-HSA-5687613
InlA-mediated entry of Listeria monocytogenes into host cells	Reactome	R-HSA-8876493	1	9	0.0432805	0.242156	CBLL1	http://www.reactome.org/cgi-bin/eventbrowser_st_id?ST_ID=R-HSA-8876493
Chylomicron assembly	Reactome	R-HSA-8963888	1	9	0.0432805	0.242156	SAR1B	http://www.reactome.org/cgi-bin/eventbrowser_st_id?ST_ID=R-HSA-8963888
CREB3 factors activate genes	Reactome	R-HSA-8874211	1	9	0.0432805	0.242156	MBTPS1	http://www.reactome.org/cgi-bin/eventbrowser_st_id?ST_ID=R-HSA-8874211
Transport of nucleotide sugars	Reactome	R-HSA-727802	1	9	0.0432805	0.242156	SLC35C1	http://www.reactome.org/cgi-bin/eventbrowser_st_id?ST_ID=R-HSA-727802
@@Parkinson disease	PANTHER	P00049	2	88	0.0602818	0.245289	TH|SNCAIP	http://www.pantherdb.org/pathway/pathwayDiagram.jsp?catAccession=P00049
@@TGF-beta signaling pathway	PANTHER	P00052	2	91	0.0638483	0.245289	GDF9|BMP1	http://www.pantherdb.org/pathway/pathwayDiagram.jsp?catAccession=P00052
NOD-like receptor signaling pathway	KEGG PATHWAY	hsa04621	3	178	0.0464968	0.245289	DNM1L|VDAC1|NAMPT	http://www.genome.jp/kegg-bin/show_pathway?hsa04621/hsa:10059%09red/hsa:7416%09red/hsa:10135%09red
Circadian clock system	PANTHER	P00015	1	10	0.0475048	0.245289	CRY2	http://www.pantherdb.org/pathway/pathwayDiagram.jsp?catAccession=P00015
TCA cycle	PANTHER	P00051	1	10	0.0475048	0.245289	SUCLG1	http://www.pantherdb.org/pathway/pathwayDiagram.jsp?catAccession=P00051
Reactions specific to the complex N-glycan synthesis pathway	Reactome	R-HSA-975578	1	10	0.0475048	0.245289	MAN2A1	http://www.reactome.org/cgi-bin/eventbrowser_st_id?ST_ID=R-HSA-975578
Initiation of Nuclear Envelope Reformation	Reactome	R-HSA-2995383	1	10	0.0475048	0.245289	PPP2CA	http://www.reactome.org/cgi-bin/eventbrowser_st_id?ST_ID=R-HSA-2995383
MASTL Facilitates Mitotic Progression	Reactome	R-HSA-2465910	1	10	0.0475048	0.245289	PPP2CA	http://www.reactome.org/cgi-bin/eventbrowser_st_id?ST_ID=R-HSA-2465910
Organic cation transport	Reactome	R-HSA-549127	1	10	0.0475048	0.245289	SLC22A5	http://www.reactome.org/cgi-bin/eventbrowser_st_id?ST_ID=R-HSA-549127
Nuclear Envelope Reassembly	Reactome	R-HSA-2995410	1	10	0.0475048	0.245289	PPP2CA	http://www.reactome.org/cgi-bin/eventbrowser_st_id?ST_ID=R-HSA-2995410
docosahexaenoate biosynthesis III (mammals)	BioCyc	PWY-7606	1	10	0.0475048	0.245289	HSD17B4	http://biocyc.org/HUMAN/NEW-IMAGE?type=NIL&object=PWY-7606
Alcoholism	KEGG PATHWAY	hsa05034	3	180	0.0477636	0.245289	DDC|SLC18A1|TH	http://www.genome.jp/kegg-bin/show_pathway?hsa05034/hsa:7054%09red/hsa:6570%09red/hsa:1644%09red
Arrhythmogenic right ventricular cardiomyopathy (ARVC)	KEGG PATHWAY	hsa05412	2	77	0.0478396	0.245289	TCF7|CTNNA2	http://www.genome.jp/kegg-bin/show_pathway?hsa05412/hsa:1496%09red/hsa:6932%09red
Endothelin signaling pathway	PANTHER	P00019	2	78	0.0489274	0.245289	PRKAR2B|PIK3CG	http://www.pantherdb.org/pathway/pathwayDiagram.jsp?catAccession=P00019
Synaptic vesicle cycle	KEGG PATHWAY	hsa04721	2	78	0.0489274	0.245289	ATP6V1B2|SLC18A1	http://www.genome.jp/kegg-bin/show_pathway?hsa04721/hsa:526%09red/hsa:6570%09red
Biosynthesis of the N-glycan precursor (dolichol lipid-linked oligosaccharide, LLO) and transfer to a nascent protein	Reactome	R-HSA-446193	2	78	0.0489274	0.245289	ALG10|SLC35C1	http://www.reactome.org/cgi-bin/eventbrowser_st_id?ST_ID=R-HSA-446193
Ubiquinone and other terpenoid-quinone biosynthesis	KEGG PATHWAY	hsa00130	1	11	0.0517105	0.245289	TAT	http://www.genome.jp/kegg-bin/show_pathway?hsa00130/hsa:6898%09red
ATF6 (ATF6-alpha) activates chaperones	Reactome	R-HSA-381033	1	11	0.0517105	0.245289	MBTPS1	http://www.reactome.org/cgi-bin/eventbrowser_st_id?ST_ID=R-HSA-381033
Regulation of gene expression by Hypoxia-inducible Factor	Reactome	R-HSA-1234158	1	11	0.0517105	0.245289	HLF	http://www.reactome.org/cgi-bin/eventbrowser_st_id?ST_ID=R-HSA-1234158
Phenylalanine and tyrosine metabolism	Reactome	R-HSA-8963691	1	11	0.0517105	0.245289	TAT	http://www.reactome.org/cgi-bin/eventbrowser_st_id?ST_ID=R-HSA-8963691
Synthesis of PIPs at the late endosome membrane	Reactome	R-HSA-1660517	1	11	0.0517105	0.245289	VAC14	http://www.reactome.org/cgi-bin/eventbrowser_st_id?ST_ID=R-HSA-1660517
RNA Polymerase II Pre-transcription Events	Reactome	R-HSA-674695	2	84	0.0556389	0.245289	AFF4|TAF2	http://www.reactome.org/cgi-bin/eventbrowser_st_id?ST_ID=R-HSA-674695
PI Metabolism	Reactome	R-HSA-1483255	2	84	0.0556389	0.245289	VAC14|PIK3CG	http://www.reactome.org/cgi-bin/eventbrowser_st_id?ST_ID=R-HSA-1483255
Erythropoietin activates Phosphoinositide-3-kinase (PI3K)	Reactome	R-HSA-9027276	1	12	0.0558977	0.245289	PIK3CG	http://www.reactome.org/cgi-bin/eventbrowser_st_id?ST_ID=R-HSA-9027276
alpha-linolenic (omega3) and linoleic (omega6) acid metabolism	Reactome	R-HSA-2046104	1	12	0.0558977	0.245289	HSD17B4	http://www.reactome.org/cgi-bin/eventbrowser_st_id?ST_ID=R-HSA-2046104
alpha-linolenic acid (ALA) metabolism	Reactome	R-HSA-2046106	1	12	0.0558977	0.245289	HSD17B4	http://www.reactome.org/cgi-bin/eventbrowser_st_id?ST_ID=R-HSA-2046106
Regulation of glycolysis by fructose 2,6-bisphosphate metabolism	Reactome	R-HSA-9634600	1	12	0.0558977	0.245289	PPP2CA	http://www.reactome.org/cgi-bin/eventbrowser_st_id?ST_ID=R-HSA-9634600
Repression of WNT target genes	Reactome	R-HSA-4641265	1	12	0.0558977	0.245289	TCF7	http://www.reactome.org/cgi-bin/eventbrowser_st_id?ST_ID=R-HSA-4641265
G2/M Transition	Reactome	R-HSA-69275	3	193	0.0564055	0.245289	PPP2CA|PRKAR2B|SKP1	http://www.reactome.org/cgi-bin/eventbrowser_st_id?ST_ID=R-HSA-69275
Transport of bile salts and organic acids, metal ions and amine compounds	Reactome	R-HSA-425366	2	85	0.0567873	0.245289	SLC22A5|SLC18A1	http://www.reactome.org/cgi-bin/eventbrowser_st_id?ST_ID=R-HSA-425366
Mitotic G2-G2/M phases	Reactome	R-HSA-453274	3	195	0.0577968	0.245289	PPP2CA|PRKAR2B|SKP1	http://www.reactome.org/cgi-bin/eventbrowser_st_id?ST_ID=R-HSA-453274
Protein-protein interactions at synapses	Reactome	R-HSA-6794362	2	86	0.057944	0.245289	LRRTM1|NLGN1	http://www.reactome.org/cgi-bin/eventbrowser_st_id?ST_ID=R-HSA-6794362
Regulation of PLK1 Activity at G2/M Transition	Reactome	R-HSA-2565942	2	86	0.057944	0.245289	PRKAR2B|SKP1	http://www.reactome.org/cgi-bin/eventbrowser_st_id?ST_ID=R-HSA-2565942
Mitotic Prometaphase	Reactome	R-HSA-68877	3	196	0.0584985	0.245289	PPP2CA|PRKAR2B|KIF2B	http://www.reactome.org/cgi-bin/eventbrowser_st_id?ST_ID=R-HSA-68877
Hemostasis	Reactome	R-HSA-109582	6	617	0.0589249	0.245289	PPP2CA|PIK3CG|DOK2|PRKAR2B|KIF3A|KIF2B	http://www.reactome.org/cgi-bin/eventbrowser_st_id?ST_ID=R-HSA-109582
Inhibition of replication initiation of damaged DNA by RB1/E2F1	Reactome	R-HSA-113501	1	13	0.0600666	0.245289	PPP2CA	http://www.reactome.org/cgi-bin/eventbrowser_st_id?ST_ID=R-HSA-113501
ERKs are inactivated	Reactome	R-HSA-202670	1	13	0.0600666	0.245289	PPP2CA	http://www.reactome.org/cgi-bin/eventbrowser_st_id?ST_ID=R-HSA-202670
Cell junction organization	Reactome	R-HSA-446728	2	90	0.0626517	0.245289	ANG|RNASE4	http://www.reactome.org/cgi-bin/eventbrowser_st_id?ST_ID=R-HSA-446728
Opioid Signalling	Reactome	R-HSA-111885	2	91	0.0638483	0.245289	PPP2CA|PRKAR2B	http://www.reactome.org/cgi-bin/eventbrowser_st_id?ST_ID=R-HSA-111885
Spry regulation of FGF signaling	Reactome	R-HSA-1295596	1	14	0.0642171	0.245289	PPP2CA	http://www.reactome.org/cgi-bin/eventbrowser_st_id?ST_ID=R-HSA-1295596
AMER1 mutants destabilize the destruction complex	Reactome	R-HSA-4839748	1	14	0.0642171	0.245289	PPP2CA	http://www.reactome.org/cgi-bin/eventbrowser_st_id?ST_ID=R-HSA-4839748
CREB1 phosphorylation through the activation of Adenylate Cyclase	Reactome	R-HSA-442720	1	14	0.0642171	0.245289	PRKAR2B	http://www.reactome.org/cgi-bin/eventbrowser_st_id?ST_ID=R-HSA-442720
APC truncation mutants have impaired AXIN binding	Reactome	R-HSA-5467337	1	14	0.0642171	0.245289	PPP2CA	http://www.reactome.org/cgi-bin/eventbrowser_st_id?ST_ID=R-HSA-5467337
Import of palmitoyl-CoA into the mitochondrial matrix	Reactome	R-HSA-200425	1	14	0.0642171	0.245289	SLC22A5	http://www.reactome.org/cgi-bin/eventbrowser_st_id?ST_ID=R-HSA-200425
Defective EXT1 causes exostoses 1, TRPS2 and CHDS	Reactome	R-HSA-3656253	1	14	0.0642171	0.245289	EXT2	http://www.reactome.org/cgi-bin/eventbrowser_st_id?ST_ID=R-HSA-3656253
truncated APC mutants destabilize the destruction complex	Reactome	R-HSA-4839744	1	14	0.0642171	0.245289	PPP2CA	http://www.reactome.org/cgi-bin/eventbrowser_st_id?ST_ID=R-HSA-4839744
AXIN missense mutants destabilize the destruction complex	Reactome	R-HSA-5467340	1	14	0.0642171	0.245289	PPP2CA	http://www.reactome.org/cgi-bin/eventbrowser_st_id?ST_ID=R-HSA-5467340
LGI-ADAM interactions	Reactome	R-HSA-5682910	1	14	0.0642171	0.245289	LGI3	http://www.reactome.org/cgi-bin/eventbrowser_st_id?ST_ID=R-HSA-5682910
Prolactin receptor signaling	Reactome	R-HSA-1170546	1	14	0.0642171	0.245289	SKP1	http://www.reactome.org/cgi-bin/eventbrowser_st_id?ST_ID=R-HSA-1170546
Defective EXT2 causes exostoses 2	Reactome	R-HSA-3656237	1	14	0.0642171	0.245289	EXT2	http://www.reactome.org/cgi-bin/eventbrowser_st_id?ST_ID=R-HSA-3656237
AXIN mutants destabilize the destruction complex, activating WNT signaling	Reactome	R-HSA-4839735	1	14	0.0642171	0.245289	PPP2CA	http://www.reactome.org/cgi-bin/eventbrowser_st_id?ST_ID=R-HSA-4839735
Truncations of AMER1 destabilize the destruction complex	Reactome	R-HSA-5467348	1	14	0.0642171	0.245289	PPP2CA	http://www.reactome.org/cgi-bin/eventbrowser_st_id?ST_ID=R-HSA-5467348
TRAF6 mediated induction of NFkB and MAP kinases upon TLR7/8 or 9 activation	Reactome	R-HSA-975138	2	92	0.0650527	0.245289	PPP2CA|SKP1	http://www.reactome.org/cgi-bin/eventbrowser_st_id?ST_ID=R-HSA-975138
Toll Like Receptor 7/8 (TLR7/8) Cascade	Reactome	R-HSA-168181	2	93	0.0662647	0.245289	PPP2CA|SKP1	http://www.reactome.org/cgi-bin/eventbrowser_st_id?ST_ID=R-HSA-168181
Toll Like Receptor 3 (TLR3) Cascade	Reactome	R-HSA-168164	2	93	0.0662647	0.245289	PPP2CA|SKP1	http://www.reactome.org/cgi-bin/eventbrowser_st_id?ST_ID=R-HSA-168164
MyD88 dependent cascade initiated on endosome	Reactome	R-HSA-975155	2	93	0.0662647	0.245289	PPP2CA|SKP1	http://www.reactome.org/cgi-bin/eventbrowser_st_id?ST_ID=R-HSA-975155
Amplification of signal from unattached kinetochores via a MAD2 inhibitory signal	Reactome	R-HSA-141444	2	94	0.0674843	0.245289	PPP2CA|KIF2B	http://www.reactome.org/cgi-bin/eventbrowser_st_id?ST_ID=R-HSA-141444
Amplification of signal from the kinetochores	Reactome	R-HSA-141424	2	94	0.0674843	0.245289	PPP2CA|KIF2B	http://www.reactome.org/cgi-bin/eventbrowser_st_id?ST_ID=R-HSA-141424
Organic cation/anion/zwitterion transport	Reactome	R-HSA-549132	1	15	0.0683494	0.245289	SLC22A5	http://www.reactome.org/cgi-bin/eventbrowser_st_id?ST_ID=R-HSA-549132
Anchoring fibril formation	Reactome	R-HSA-2214320	1	15	0.0683494	0.245289	BMP1	http://www.reactome.org/cgi-bin/eventbrowser_st_id?ST_ID=R-HSA-2214320
S45 mutants of beta-catenin aren't phosphorylated	Reactome	R-HSA-5358751	1	15	0.0683494	0.245289	PPP2CA	http://www.reactome.org/cgi-bin/eventbrowser_st_id?ST_ID=R-HSA-5358751
phosphorylation site mutants of CTNNB1 are not targeted to the proteasome by the destruction complex	Reactome	R-HSA-4839743	1	15	0.0683494	0.245289	PPP2CA	http://www.reactome.org/cgi-bin/eventbrowser_st_id?ST_ID=R-HSA-4839743
T41 mutants of beta-catenin aren't phosphorylated	Reactome	R-HSA-5358752	1	15	0.0683494	0.245289	PPP2CA	http://www.reactome.org/cgi-bin/eventbrowser_st_id?ST_ID=R-HSA-5358752
S37 mutants of beta-catenin aren't phosphorylated	Reactome	R-HSA-5358749	1	15	0.0683494	0.245289	PPP2CA	http://www.reactome.org/cgi-bin/eventbrowser_st_id?ST_ID=R-HSA-5358749
S33 mutants of beta-catenin aren't phosphorylated	Reactome	R-HSA-5358747	1	15	0.0683494	0.245289	PPP2CA	http://www.reactome.org/cgi-bin/eventbrowser_st_id?ST_ID=R-HSA-5358747
Misspliced GSK3beta mutants stabilize beta-catenin	Reactome	R-HSA-5339716	1	15	0.0683494	0.245289	PPP2CA	http://www.reactome.org/cgi-bin/eventbrowser_st_id?ST_ID=R-HSA-5339716
Toll Like Receptor TLR6:TLR2 Cascade	Reactome	R-HSA-168188	2	95	0.0687112	0.245289	PPP2CA|SKP1	http://www.reactome.org/cgi-bin/eventbrowser_st_id?ST_ID=R-HSA-168188
MyD88:MAL(TIRAP) cascade initiated on plasma membrane	Reactome	R-HSA-166058	2	95	0.0687112	0.245289	PPP2CA|SKP1	http://www.reactome.org/cgi-bin/eventbrowser_st_id?ST_ID=R-HSA-166058
Keratinization	Reactome	R-HSA-6805567	3	213	0.0710337	0.245289	KRTAP5-4|KRTAP5-5|KRTAP5-6	http://www.reactome.org/cgi-bin/eventbrowser_st_id?ST_ID=R-HSA-6805567
Toll Like Receptor 9 (TLR9) Cascade	Reactome	R-HSA-168138	2	97	0.0711872	0.245289	PPP2CA|SKP1	http://www.reactome.org/cgi-bin/eventbrowser_st_id?ST_ID=R-HSA-168138
Toll Like Receptor 2 (TLR2) Cascade	Reactome	R-HSA-181438	2	98	0.072436	0.245289	PPP2CA|SKP1	http://www.reactome.org/cgi-bin/eventbrowser_st_id?ST_ID=R-HSA-181438
Toll Like Receptor TLR1:TLR2 Cascade	Reactome	R-HSA-168179	2	98	0.072436	0.245289	PPP2CA|SKP1	http://www.reactome.org/cgi-bin/eventbrowser_st_id?ST_ID=R-HSA-168179
MyD88-independent TLR4 cascade	Reactome	R-HSA-166166	2	98	0.072436	0.245289	PPP2CA|SKP1	http://www.reactome.org/cgi-bin/eventbrowser_st_id?ST_ID=R-HSA-166166
TRIF(TICAM1)-mediated TLR4 signaling	Reactome	R-HSA-937061	2	98	0.072436	0.245289	PPP2CA|SKP1	http://www.reactome.org/cgi-bin/eventbrowser_st_id?ST_ID=R-HSA-937061
5HT3 type receptor mediated signaling pathway	PANTHER	P04375	1	16	0.0724636	0.245289	SLC18A1	http://www.pantherdb.org/pathway/pathwayDiagram.jsp?catAccession=P04375
MAP3K8 (TPL2)-dependent MAPK1/3 activation	Reactome	R-HSA-5684264	1	16	0.0724636	0.245289	SKP1	http://www.reactome.org/cgi-bin/eventbrowser_st_id?ST_ID=R-HSA-5684264
Synthesis of PIPs at the early endosome membrane	Reactome	R-HSA-1660516	1	16	0.0724636	0.245289	VAC14	http://www.reactome.org/cgi-bin/eventbrowser_st_id?ST_ID=R-HSA-1660516
Metabolism of folate and pterines	Reactome	R-HSA-196757	1	16	0.0724636	0.245289	RFC1	http://www.reactome.org/cgi-bin/eventbrowser_st_id?ST_ID=R-HSA-196757
dermatan sulfate biosynthesis	BioCyc	PWY-6571	1	16	0.0724636	0.245289	CSGALNACT1	http://biocyc.org/HUMAN/NEW-IMAGE?type=NIL&object=PWY-6571
COPI-dependent Golgi-to-ER retrograde traffic	Reactome	R-HSA-6811434	2	99	0.0736919	0.245644	KIF2B|KIF3A	http://www.reactome.org/cgi-bin/eventbrowser_st_id?ST_ID=R-HSA-6811434
Respiratory electron transport	Reactome	R-HSA-611105	2	100	0.0749548	0.245644	COX11|UQCRQ	http://www.reactome.org/cgi-bin/eventbrowser_st_id?ST_ID=R-HSA-611105
Human T-cell leukemia virus 1 infection	KEGG PATHWAY	hsa05166	3	219	0.0757235	0.245644	VDAC1|VAC14|PTTG2	http://www.genome.jp/kegg-bin/show_pathway?hsa05166/hsa:10744%09red/hsa:7416%09red/hsa:55697%09red
COPI-mediated anterograde transport	Reactome	R-HSA-6807878	2	101	0.0762246	0.245644	COG5|COG4	http://www.reactome.org/cgi-bin/eventbrowser_st_id?ST_ID=R-HSA-6807878
Primary bile acid biosynthesis	KEGG PATHWAY	hsa00120	1	17	0.0765598	0.245644	HSD17B4	http://www.genome.jp/kegg-bin/show_pathway?hsa00120/hsa:3295%09red
PKA activation in glucagon signalling	Reactome	R-HSA-164378	1	17	0.0765598	0.245644	PRKAR2B	http://www.reactome.org/cgi-bin/eventbrowser_st_id?ST_ID=R-HSA-164378
Plasma lipoprotein assembly	Reactome	R-HSA-8963898	1	17	0.0765598	0.245644	SAR1B	http://www.reactome.org/cgi-bin/eventbrowser_st_id?ST_ID=R-HSA-8963898
Assembly of active LPL and LIPC lipase complexes	Reactome	R-HSA-8963889	1	17	0.0765598	0.245644	MBTPS1	http://www.reactome.org/cgi-bin/eventbrowser_st_id?ST_ID=R-HSA-8963889
Tie2 Signaling	Reactome	R-HSA-210993	1	17	0.0765598	0.245644	DOK2	http://www.reactome.org/cgi-bin/eventbrowser_st_id?ST_ID=R-HSA-210993
Platelet sensitization by LDL	Reactome	R-HSA-432142	1	17	0.0765598	0.245644	PPP2CA	http://www.reactome.org/cgi-bin/eventbrowser_st_id?ST_ID=R-HSA-432142
Beta-catenin phosphorylation cascade	Reactome	R-HSA-196299	1	17	0.0765598	0.245644	PPP2CA	http://www.reactome.org/cgi-bin/eventbrowser_st_id?ST_ID=R-HSA-196299
Transcriptional Regulation by TP53	Reactome	R-HSA-3700989	4	359	0.0778168	0.2485	TTC5|COX11|TAF2|PPP2CA	http://www.reactome.org/cgi-bin/eventbrowser_st_id?ST_ID=R-HSA-3700989
FGF signaling pathway	PANTHER	P00021	2	103	0.0787847	0.25041	PPP2CA|PIK3CG	http://www.pantherdb.org/pathway/pathwayDiagram.jsp?catAccession=P00021
@@TCA cycle	BioCyc	PWY66-398	1	18	0.0806379	0.251575	SUCLG1	http://biocyc.org/HUMAN/NEW-IMAGE?type=NIL&object=PWY66-398
Synthesis of PIPs at the Golgi membrane	Reactome	R-HSA-1660514	1	18	0.0806379	0.251575	VAC14	http://www.reactome.org/cgi-bin/eventbrowser_st_id?ST_ID=R-HSA-1660514
Activation of SMO	Reactome	R-HSA-5635838	1	18	0.0806379	0.251575	KIF3A	http://www.reactome.org/cgi-bin/eventbrowser_st_id?ST_ID=R-HSA-5635838
Metabolism of Angiotensinogen to Angiotensins	Reactome	R-HSA-2022377	1	18	0.0806379	0.251575	CTSD	http://www.reactome.org/cgi-bin/eventbrowser_st_id?ST_ID=R-HSA-2022377
Transport of inorganic cations/anions and amino acids/oligopeptides	Reactome	R-HSA-425393	2	107	0.0839843	0.252602	SLC26A3|SLC26A4	http://www.reactome.org/cgi-bin/eventbrowser_st_id?ST_ID=R-HSA-425393
Integration of energy metabolism	Reactome	R-HSA-163685	2	107	0.0839843	0.252602	PPP2CA|PRKAR2B	http://www.reactome.org/cgi-bin/eventbrowser_st_id?ST_ID=R-HSA-163685
Steroid biosynthesis	KEGG PATHWAY	hsa00100	1	19	0.0846981	0.252602	MSMO1	http://www.genome.jp/kegg-bin/show_pathway?hsa00100/hsa:6307%09red
Listeria monocytogenes entry into host cells	Reactome	R-HSA-8876384	1	19	0.0846981	0.252602	CBLL1	http://www.reactome.org/cgi-bin/eventbrowser_st_id?ST_ID=R-HSA-8876384
Protein methylation	Reactome	R-HSA-8876725	1	19	0.0846981	0.252602	METTL20	http://www.reactome.org/cgi-bin/eventbrowser_st_id?ST_ID=R-HSA-8876725
Regulation of TP53 Activity through Methylation	Reactome	R-HSA-6804760	1	19	0.0846981	0.252602	TTC5	http://www.reactome.org/cgi-bin/eventbrowser_st_id?ST_ID=R-HSA-6804760
Chondroitin sulfate biosynthesis	Reactome	R-HSA-2022870	1	19	0.0846981	0.252602	CSGALNACT1	http://www.reactome.org/cgi-bin/eventbrowser_st_id?ST_ID=R-HSA-2022870
Na+/Cl- dependent neurotransmitter transporters	Reactome	R-HSA-442660	1	19	0.0846981	0.252602	SLC18A1	http://www.reactome.org/cgi-bin/eventbrowser_st_id?ST_ID=R-HSA-442660
PKA activation	Reactome	R-HSA-163615	1	19	0.0846981	0.252602	PRKAR2B	http://www.reactome.org/cgi-bin/eventbrowser_st_id?ST_ID=R-HSA-163615
Nicotinamide salvaging	Reactome	R-HSA-197264	1	19	0.0846981	0.252602	NAMPT	http://www.reactome.org/cgi-bin/eventbrowser_st_id?ST_ID=R-HSA-197264
Mitotic Spindle Checkpoint	Reactome	R-HSA-69618	2	110	0.0879509	0.258954	PPP2CA|KIF2B	http://www.reactome.org/cgi-bin/eventbrowser_st_id?ST_ID=R-HSA-69618
Hedgehog signaling pathway	PANTHER	P00025	1	20	0.0887405	0.258954	PRKAR2B	http://www.pantherdb.org/pathway/pathwayDiagram.jsp?catAccession=P00025
Glycosaminoglycan biosynthesis - chondroitin sulfate / dermatan sulfate	KEGG PATHWAY	hsa00532	1	20	0.0887405	0.258954	CSGALNACT1	http://www.genome.jp/kegg-bin/show_pathway?hsa00532/hsa:55790%09red
CTLA4 inhibitory signaling	Reactome	R-HSA-389513	1	20	0.0887405	0.258954	PPP2CA	http://www.reactome.org/cgi-bin/eventbrowser_st_id?ST_ID=R-HSA-389513
heparan sulfate biosynthesis (late stages)	BioCyc	PWY-6558	1	20	0.0887405	0.258954	EXT2	http://biocyc.org/HUMAN/NEW-IMAGE?type=NIL&object=PWY-6558
Pathways in cancer	KEGG PATHWAY	hsa05200	5	530	0.0893007	0.25947	HLF|TCF7|IL4|CTNNA2|SKP1	http://www.genome.jp/kegg-bin/show_pathway?hsa05200/hsa:1496%09red/hsa:2034%09red/hsa:6932%09red/hsa:3565%09red/hsa:6500%09red
Leukocyte transendothelial migration	KEGG PATHWAY	hsa04670	2	112	0.0906259	0.262196	RHOH|CTNNA2	http://www.genome.jp/kegg-bin/show_pathway?hsa04670/hsa:1496%09red/hsa:399%09red
@@chondroitin sulfate biosynthesis	BioCyc	PWY-6569	1	21	0.0927652	0.263874	CSGALNACT1	http://biocyc.org/HUMAN/NEW-IMAGE?type=NIL&object=PWY-6569
p53 pathway by glucose deprivation	PANTHER	P04397	1	21	0.0927652	0.263874	PPP2CA	http://www.pantherdb.org/pathway/pathwayDiagram.jsp?catAccession=P04397
Mitochondrial tRNA aminoacylation	Reactome	R-HSA-379726	1	21	0.0927652	0.263874	YARS2	http://www.reactome.org/cgi-bin/eventbrowser_st_id?ST_ID=R-HSA-379726
PKA-mediated phosphorylation of CREB	Reactome	R-HSA-111931	1	21	0.0927652	0.263874	PRKAR2B	http://www.reactome.org/cgi-bin/eventbrowser_st_id?ST_ID=R-HSA-111931
EGF receptor signaling pathway	PANTHER	P00018	2	114	0.0933247	0.264355	PPP2CA|PIK3CG	http://www.pantherdb.org/pathway/pathwayDiagram.jsp?catAccession=P00018
Serotonergic synapse	KEGG PATHWAY	hsa04726	2	115	0.0946829	0.265242	DDC|SLC18A1	http://www.genome.jp/kegg-bin/show_pathway?hsa04726/hsa:6570%09red/hsa:1644%09red
Innate Immune System	Reactome	R-HSA-168249	8	1043	0.095206	0.265242	SKP1|PPP2CA|CTSD|TLR10|LEAP2|REG3G|ATP6V1B2|REG3A	http://www.reactome.org/cgi-bin/eventbrowser_st_id?ST_ID=R-HSA-168249
Pink/Parkin Mediated Mitophagy	Reactome	R-HSA-5205685	1	22	0.0967722	0.265242	VDAC1	http://www.reactome.org/cgi-bin/eventbrowser_st_id?ST_ID=R-HSA-5205685
Citric acid cycle (TCA cycle)	Reactome	R-HSA-71403	1	22	0.0967722	0.265242	SUCLG1	http://www.reactome.org/cgi-bin/eventbrowser_st_id?ST_ID=R-HSA-71403
E2F mediated regulation of DNA replication	Reactome	R-HSA-113510	1	22	0.0967722	0.265242	PPP2CA	http://www.reactome.org/cgi-bin/eventbrowser_st_id?ST_ID=R-HSA-113510
Transcriptional regulation of pluripotent stem cells	Reactome	R-HSA-452723	1	22	0.0967722	0.265242	HLF	http://www.reactome.org/cgi-bin/eventbrowser_st_id?ST_ID=R-HSA-452723
ERK/MAPK targets	Reactome	R-HSA-198753	1	22	0.0967722	0.265242	PPP2CA	http://www.reactome.org/cgi-bin/eventbrowser_st_id?ST_ID=R-HSA-198753
fatty acid beta-oxidation (peroxisome)	BioCyc	PWY66-391	1	22	0.0967722	0.265242	HSD17B4	http://biocyc.org/HUMAN/NEW-IMAGE?type=NIL&object=PWY66-391
Sphingolipid signaling pathway	KEGG PATHWAY	hsa04071	2	119	0.100172	0.270687	PPP2CA|CTSD	http://www.genome.jp/kegg-bin/show_pathway?hsa04071/hsa:1509%09red/hsa:5515%09red
Synthesis of bile acids and bile salts via 7alpha-hydroxycholesterol	Reactome	R-HSA-193368	1	23	0.100762	0.270687	HSD17B4	http://www.reactome.org/cgi-bin/eventbrowser_st_id?ST_ID=R-HSA-193368
Mitochondrial calcium ion transport	Reactome	R-HSA-8949215	1	23	0.100762	0.270687	VDAC1	http://www.reactome.org/cgi-bin/eventbrowser_st_id?ST_ID=R-HSA-8949215
Negative regulation of FGFR3 signaling	Reactome	R-HSA-5654732	1	23	0.100762	0.270687	PPP2CA	http://www.reactome.org/cgi-bin/eventbrowser_st_id?ST_ID=R-HSA-5654732
Peroxisomal lipid metabolism	Reactome	R-HSA-390918	1	23	0.100762	0.270687	HSD17B4	http://www.reactome.org/cgi-bin/eventbrowser_st_id?ST_ID=R-HSA-390918
AMPK signaling pathway	KEGG PATHWAY	hsa04152	2	120	0.101558	0.270687	PPP2CA|TBC1D1	http://www.genome.jp/kegg-bin/show_pathway?hsa04152/hsa:5515%09red/hsa:23216%09red
Metabolism of water-soluble vitamins and cofactors	Reactome	R-HSA-196849	2	120	0.101558	0.270687	RFC1|NAMPT	http://www.reactome.org/cgi-bin/eventbrowser_st_id?ST_ID=R-HSA-196849
Histamine H2 receptor mediated signaling pathway	PANTHER	P04386	1	24	0.104733	0.270855	PRKAR2B	http://www.pantherdb.org/pathway/pathwayDiagram.jsp?catAccession=P04386
Vitamin digestion and absorption	KEGG PATHWAY	hsa04977	1	24	0.104733	0.270855	RFC1	http://www.genome.jp/kegg-bin/show_pathway?hsa04977/hsa:6573%09red
Glycosaminoglycan biosynthesis - heparan sulfate / heparin	KEGG PATHWAY	hsa00534	1	24	0.104733	0.270855	EXT2	http://www.genome.jp/kegg-bin/show_pathway?hsa00534/hsa:2132%09red
Cholesterol biosynthesis	Reactome	R-HSA-191273	1	24	0.104733	0.270855	MSMO1	http://www.reactome.org/cgi-bin/eventbrowser_st_id?ST_ID=R-HSA-191273
Diseases associated with the TLR signaling cascade	Reactome	R-HSA-5602358	1	24	0.104733	0.270855	TLR10	http://www.reactome.org/cgi-bin/eventbrowser_st_id?ST_ID=R-HSA-5602358
Signaling by Erythropoietin	Reactome	R-HSA-9006335	1	24	0.104733	0.270855	PIK3CG	http://www.reactome.org/cgi-bin/eventbrowser_st_id?ST_ID=R-HSA-9006335
Diseases of Immune System	Reactome	R-HSA-5260271	1	24	0.104733	0.270855	TLR10	http://www.reactome.org/cgi-bin/eventbrowser_st_id?ST_ID=R-HSA-5260271
Respiratory electron transport, ATP synthesis by chemiosmotic coupling, and heat production by uncoupling proteins.	Reactome	R-HSA-163200	2	123	0.105747	0.270855	COX11|UQCRQ	http://www.reactome.org/cgi-bin/eventbrowser_st_id?ST_ID=R-HSA-163200
Glycosaminoglycan metabolism	Reactome	R-HSA-1630316	2	123	0.105747	0.270855	EXT2|CSGALNACT1	http://www.reactome.org/cgi-bin/eventbrowser_st_id?ST_ID=R-HSA-1630316
Resolution of Sister Chromatid Cohesion	Reactome	R-HSA-2500257	2	123	0.105747	0.270855	PPP2CA|KIF2B	http://www.reactome.org/cgi-bin/eventbrowser_st_id?ST_ID=R-HSA-2500257
Neuronal System	Reactome	R-HSA-112316	4	402	0.106022	0.270855	KCNG4|PRKAR2B|LRRTM1|NLGN1	http://www.reactome.org/cgi-bin/eventbrowser_st_id?ST_ID=R-HSA-112316
Cell cycle	KEGG PATHWAY	hsa04110	2	124	0.107154	0.271519	PTTG2|SKP1	http://www.genome.jp/kegg-bin/show_pathway?hsa04110/hsa:10744%09red/hsa:6500%09red
Cell-Cell communication	Reactome	R-HSA-1500931	2	125	0.108566	0.271519	ANG|RNASE4	http://www.reactome.org/cgi-bin/eventbrowser_st_id?ST_ID=R-HSA-1500931
Nuclear Events (kinase and transcription factor activation)	Reactome	R-HSA-198725	1	25	0.108688	0.271519	PPP2CA	http://www.reactome.org/cgi-bin/eventbrowser_st_id?ST_ID=R-HSA-198725
Glucuronidation	Reactome	R-HSA-156588	1	25	0.108688	0.271519	UGDH	http://www.reactome.org/cgi-bin/eventbrowser_st_id?ST_ID=R-HSA-156588
G beta:gamma signalling through PI3Kgamma	Reactome	R-HSA-392451	1	25	0.108688	0.271519	PIK3CG	http://www.reactome.org/cgi-bin/eventbrowser_st_id?ST_ID=R-HSA-392451
Cyclin A/B1/B2 associated events during G2/M transition	Reactome	R-HSA-69273	1	25	0.108688	0.271519	PPP2CA	http://www.reactome.org/cgi-bin/eventbrowser_st_id?ST_ID=R-HSA-69273
Developmental Biology	Reactome	R-HSA-1266738	8	1082	0.111001	0.274772	KRTAP5-4|KRTAP5-5|KRTAP5-6|LGI3|DOK2|GFRA2|HLF|CTNNA2	http://www.reactome.org/cgi-bin/eventbrowser_st_id?ST_ID=R-HSA-1266738
Hypoxia response via HIF activation	PANTHER	P00030	1	26	0.112625	0.274772	PIK3CG	http://www.pantherdb.org/pathway/pathwayDiagram.jsp?catAccession=P00030
N-glycan antennae elongation in the medial/trans-Golgi	Reactome	R-HSA-975576	1	26	0.112625	0.274772	MAN2A1	http://www.reactome.org/cgi-bin/eventbrowser_st_id?ST_ID=R-HSA-975576
Insulin receptor recycling	Reactome	R-HSA-77387	1	26	0.112625	0.274772	ATP6V1B2	http://www.reactome.org/cgi-bin/eventbrowser_st_id?ST_ID=R-HSA-77387
Negative regulation of FGFR1 signaling	Reactome	R-HSA-5654726	1	26	0.112625	0.274772	PPP2CA	http://www.reactome.org/cgi-bin/eventbrowser_st_id?ST_ID=R-HSA-5654726
stearate biosynthesis	BioCyc	PWY-5972	1	26	0.112625	0.274772	HSD17B4	http://biocyc.org/HUMAN/NEW-IMAGE?type=NIL&object=PWY-5972
Toll Like Receptor 4 (TLR4) Cascade	Reactome	R-HSA-166016	2	128	0.112831	0.274772	PPP2CA|SKP1	http://www.reactome.org/cgi-bin/eventbrowser_st_id?ST_ID=R-HSA-166016
G1/S Transition	Reactome	R-HSA-69206	2	130	0.115699	0.274915	PPP2CA|SKP1	http://www.reactome.org/cgi-bin/eventbrowser_st_id?ST_ID=R-HSA-69206
Biosynthesis of unsaturated fatty acids	KEGG PATHWAY	hsa01040	1	27	0.116545	0.274915	HSD17B4	http://www.genome.jp/kegg-bin/show_pathway?hsa01040/hsa:3295%09red
Ascorbate and aldarate metabolism	KEGG PATHWAY	hsa00053	1	27	0.116545	0.274915	UGDH	http://www.genome.jp/kegg-bin/show_pathway?hsa00053/hsa:7358%09red
Collecting duct acid secretion	KEGG PATHWAY	hsa04966	1	27	0.116545	0.274915	ATP6V1B2	http://www.genome.jp/kegg-bin/show_pathway?hsa04966/hsa:526%09red
Mitophagy	Reactome	R-HSA-5205647	1	27	0.116545	0.274915	VDAC1	http://www.reactome.org/cgi-bin/eventbrowser_st_id?ST_ID=R-HSA-5205647
BMAL1:CLOCK,NPAS2 activates circadian gene expression	Reactome	R-HSA-1368108	1	27	0.116545	0.274915	NAMPT	http://www.reactome.org/cgi-bin/eventbrowser_st_id?ST_ID=R-HSA-1368108
Negative regulation of FGFR4 signaling	Reactome	R-HSA-5654733	1	27	0.116545	0.274915	PPP2CA	http://www.reactome.org/cgi-bin/eventbrowser_st_id?ST_ID=R-HSA-5654733
3-phosphoinositide biosynthesis	BioCyc	PWY-6352	1	27	0.116545	0.274915	PIK3CG	http://biocyc.org/HUMAN/NEW-IMAGE?type=NIL&object=PWY-6352
heparan sulfate biosynthesis	BioCyc	PWY-6564	1	27	0.116545	0.274915	EXT2	http://biocyc.org/HUMAN/NEW-IMAGE?type=NIL&object=PWY-6564
Golgi-to-ER retrograde transport	Reactome	R-HSA-8856688	2	133	0.120034	0.280216	KIF2B|KIF3A	http://www.reactome.org/cgi-bin/eventbrowser_st_id?ST_ID=R-HSA-8856688
Negative regulation of FGFR2 signaling	Reactome	R-HSA-5654727	1	28	0.120447	0.280216	PPP2CA	http://www.reactome.org/cgi-bin/eventbrowser_st_id?ST_ID=R-HSA-5654727
Plasma lipoprotein remodeling	Reactome	R-HSA-8963899	1	28	0.120447	0.280216	MBTPS1	http://www.reactome.org/cgi-bin/eventbrowser_st_id?ST_ID=R-HSA-8963899
Signaling by BMP	Reactome	R-HSA-201451	1	28	0.120447	0.280216	NOG	http://www.reactome.org/cgi-bin/eventbrowser_st_id?ST_ID=R-HSA-201451
Spliceosome	KEGG PATHWAY	hsa03040	2	135	0.122947	0.284564	SF3B3|DDX46	http://www.genome.jp/kegg-bin/show_pathway?hsa03040/hsa:9879%09red/hsa:23450%09red
Myogenesis	Reactome	R-HSA-525793	1	29	0.124333	0.284564	CTNNA2	http://www.reactome.org/cgi-bin/eventbrowser_st_id?ST_ID=R-HSA-525793
Surfactant metabolism	Reactome	R-HSA-5683826	1	29	0.124333	0.284564	SFTPC	http://www.reactome.org/cgi-bin/eventbrowser_st_id?ST_ID=R-HSA-5683826
RHO GTPases Activate Formins	Reactome	R-HSA-5663220	2	136	0.12441	0.284564	PPP2CA|KIF2B	http://www.reactome.org/cgi-bin/eventbrowser_st_id?ST_ID=R-HSA-5663220
Ubiquitin mediated proteolysis	KEGG PATHWAY	hsa04120	2	137	0.125877	0.284564	UBE2B|SKP1	http://www.genome.jp/kegg-bin/show_pathway?hsa04120/hsa:6500%09red/hsa:7320%09red
Rho GTPase cycle	Reactome	R-HSA-194840	2	138	0.127348	0.284564	FGD4|RHOH	http://www.reactome.org/cgi-bin/eventbrowser_st_id?ST_ID=R-HSA-194840
Interleukin-1 family signaling	Reactome	R-HSA-446652	2	138	0.127348	0.284564	IL4|SKP1	http://www.reactome.org/cgi-bin/eventbrowser_st_id?ST_ID=R-HSA-446652
General transcription regulation	PANTHER	P00023	1	30	0.128201	0.284564	TAF2	http://www.pantherdb.org/pathway/pathwayDiagram.jsp?catAccession=P00023
Axon guidance mediated by netrin	PANTHER	P00009	1	30	0.128201	0.284564	PIK3CG	http://www.pantherdb.org/pathway/pathwayDiagram.jsp?catAccession=P00009
Nicotinate and nicotinamide metabolism	KEGG PATHWAY	hsa00760	1	30	0.128201	0.284564	NAMPT	http://www.genome.jp/kegg-bin/show_pathway?hsa00760/hsa:10135%09red
Citrate cycle (TCA cycle)	KEGG PATHWAY	hsa00020	1	30	0.128201	0.284564	SUCLG1	http://www.genome.jp/kegg-bin/show_pathway?hsa00020/hsa:8802%09red
Recognition of DNA damage by PCNA-containing replication complex	Reactome	R-HSA-110314	1	30	0.128201	0.284564	UBE2B	http://www.reactome.org/cgi-bin/eventbrowser_st_id?ST_ID=R-HSA-110314
Pyruvate metabolism	Reactome	R-HSA-70268	1	30	0.128201	0.284564	VDAC1	http://www.reactome.org/cgi-bin/eventbrowser_st_id?ST_ID=R-HSA-70268
Synthesis of active ubiquitin: roles of E1 and E2 enzymes	Reactome	R-HSA-8866652	1	30	0.128201	0.284564	UBE2B	http://www.reactome.org/cgi-bin/eventbrowser_st_id?ST_ID=R-HSA-8866652
5HT4 type receptor mediated signaling pathway	PANTHER	P04376	1	31	0.132052	0.285621	SLC18A1	http://www.pantherdb.org/pathway/pathwayDiagram.jsp?catAccession=P04376
Asthma	KEGG PATHWAY	hsa05310	1	31	0.132052	0.285621	IL4	http://www.genome.jp/kegg-bin/show_pathway?hsa05310/hsa:3565%09red
Antifolate resistance	KEGG PATHWAY	hsa01523	1	31	0.132052	0.285621	RFC1	http://www.genome.jp/kegg-bin/show_pathway?hsa01523/hsa:6573%09red
MAPK targets/ Nuclear events mediated by MAP kinases	Reactome	R-HSA-450282	1	31	0.132052	0.285621	PPP2CA	http://www.reactome.org/cgi-bin/eventbrowser_st_id?ST_ID=R-HSA-450282
HS-GAG biosynthesis	Reactome	R-HSA-2022928	1	31	0.132052	0.285621	EXT2	http://www.reactome.org/cgi-bin/eventbrowser_st_id?ST_ID=R-HSA-2022928
Transferrin endocytosis and recycling	Reactome	R-HSA-917977	1	31	0.132052	0.285621	ATP6V1B2	http://www.reactome.org/cgi-bin/eventbrowser_st_id?ST_ID=R-HSA-917977
Nicotinate metabolism	Reactome	R-HSA-196807	1	31	0.132052	0.285621	NAMPT	http://www.reactome.org/cgi-bin/eventbrowser_st_id?ST_ID=R-HSA-196807
Disassembly of the destruction complex and recruitment of AXIN to the membrane	Reactome	R-HSA-4641262	1	31	0.132052	0.285621	PPP2CA	http://www.reactome.org/cgi-bin/eventbrowser_st_id?ST_ID=R-HSA-4641262
RNA Polymerase II Transcription	Reactome	R-HSA-73857	9	1316	0.133458	0.287743	TTC5|TCF7|TAF2|SKP1|PPP2CA|AFF4|ZNF19|ZNF23|COX11	http://www.reactome.org/cgi-bin/eventbrowser_st_id?ST_ID=R-HSA-73857
Autophagy - other	KEGG PATHWAY	hsa04136	1	32	0.135887	0.290206	PPP2CA	http://www.genome.jp/kegg-bin/show_pathway?hsa04136/hsa:5515%09red
G-protein beta:gamma signalling	Reactome	R-HSA-397795	1	32	0.135887	0.290206	PIK3CG	http://www.reactome.org/cgi-bin/eventbrowser_st_id?ST_ID=R-HSA-397795
RAF activation	Reactome	R-HSA-5673000	1	32	0.135887	0.290206	PPP2CA	http://www.reactome.org/cgi-bin/eventbrowser_st_id?ST_ID=R-HSA-5673000
Metabolism of carbohydrates	Reactome	R-HSA-71387	3	288	0.138368	0.292817	PPP2CA|EXT2|CSGALNACT1	http://www.reactome.org/cgi-bin/eventbrowser_st_id?ST_ID=R-HSA-71387
Enkephalin release	PANTHER	P05913	1	33	0.139704	0.292817	PRKAR2B	http://www.pantherdb.org/pathway/pathwayDiagram.jsp?catAccession=P05913
Synthesis of bile acids and bile salts	Reactome	R-HSA-192105	1	33	0.139704	0.292817	HSD17B4	http://www.reactome.org/cgi-bin/eventbrowser_st_id?ST_ID=R-HSA-192105
Glucagon signaling in metabolic regulation	Reactome	R-HSA-163359	1	33	0.139704	0.292817	PRKAR2B	http://www.reactome.org/cgi-bin/eventbrowser_st_id?ST_ID=R-HSA-163359
Activation of Matrix Metalloproteinases	Reactome	R-HSA-1592389	1	33	0.139704	0.292817	SPOCK3	http://www.reactome.org/cgi-bin/eventbrowser_st_id?ST_ID=R-HSA-1592389
Signaling by FGFR3	Reactome	R-HSA-5654741	1	33	0.139704	0.292817	PPP2CA	http://www.reactome.org/cgi-bin/eventbrowser_st_id?ST_ID=R-HSA-5654741
Mitotic G1-G1/S phases	Reactome	R-HSA-453279	2	147	0.140766	0.294092	PPP2CA|SKP1	http://www.reactome.org/cgi-bin/eventbrowser_st_id?ST_ID=R-HSA-453279
Signaling by Rho GTPases	Reactome	R-HSA-194315	4	449	0.14136	0.294092	PPP2CA|FGD4|RHOH|KIF2B	http://www.reactome.org/cgi-bin/eventbrowser_st_id?ST_ID=R-HSA-194315
Signaling by Interleukins	Reactome	R-HSA-449147	5	619	0.143353	0.294092	PPP2CA|IL4|LPL|GFRA2|SKP1	http://www.reactome.org/cgi-bin/eventbrowser_st_id?ST_ID=R-HSA-449147
Pentose and glucuronate interconversions	KEGG PATHWAY	hsa00040	1	34	0.143505	0.294092	UGDH	http://www.genome.jp/kegg-bin/show_pathway?hsa00040/hsa:7358%09red
Propanoate metabolism	KEGG PATHWAY	hsa00640	1	34	0.143505	0.294092	SUCLG1	http://www.genome.jp/kegg-bin/show_pathway?hsa00640/hsa:8802%09red
Signaling by WNT in cancer	Reactome	R-HSA-4791275	1	34	0.143505	0.294092	PPP2CA	http://www.reactome.org/cgi-bin/eventbrowser_st_id?ST_ID=R-HSA-4791275
Gastric cancer	KEGG PATHWAY	hsa05226	2	149	0.143788	0.294092	TCF7|CTNNA2	http://www.genome.jp/kegg-bin/show_pathway?hsa05226/hsa:1496%09red/hsa:6932%09red
Adrenergic signaling in cardiomyocytes	KEGG PATHWAY	hsa04261	2	149	0.143788	0.294092	PPP2CA|PIK3CG	http://www.genome.jp/kegg-bin/show_pathway?hsa04261/hsa:5515%09red/hsa:5294%09red
Wnt signaling pathway	PANTHER	P00057	3	294	0.14447	0.294597	PPP2CA|PCDH20|CTNNA2	http://www.pantherdb.org/pathway/pathwayDiagram.jsp?catAccession=P00057
GABA-B receptor II signaling	PANTHER	P05731	1	35	0.147289	0.29677	PRKAR2B	http://www.pantherdb.org/pathway/pathwayDiagram.jsp?catAccession=P05731
Insulin/IGF pathway-protein kinase B signaling cascade	PANTHER	P00033	1	35	0.147289	0.29677	PIK3CG	http://www.pantherdb.org/pathway/pathwayDiagram.jsp?catAccession=P00033
GPVI-mediated activation cascade	Reactome	R-HSA-114604	1	35	0.147289	0.29677	PIK3CG	http://www.reactome.org/cgi-bin/eventbrowser_st_id?ST_ID=R-HSA-114604
Regulation of TP53 Degradation	Reactome	R-HSA-6804757	1	35	0.147289	0.29677	PPP2CA	http://www.reactome.org/cgi-bin/eventbrowser_st_id?ST_ID=R-HSA-6804757
mTOR signaling pathway	KEGG PATHWAY	hsa04150	2	153	0.149873	0.299022	ATP6V1B2|DEPTOR	http://www.genome.jp/kegg-bin/show_pathway?hsa04150/hsa:526%09red/hsa:64798%09red
Calmodulin induced events	Reactome	R-HSA-111933	1	36	0.151057	0.299022	PRKAR2B	http://www.reactome.org/cgi-bin/eventbrowser_st_id?ST_ID=R-HSA-111933
Signaling by FGFR4	Reactome	R-HSA-5654743	1	36	0.151057	0.299022	PPP2CA	http://www.reactome.org/cgi-bin/eventbrowser_st_id?ST_ID=R-HSA-5654743
ROS and RNS production in phagocytes	Reactome	R-HSA-1222556	1	36	0.151057	0.299022	ATP6V1B2	http://www.reactome.org/cgi-bin/eventbrowser_st_id?ST_ID=R-HSA-1222556
CaM pathway	Reactome	R-HSA-111997	1	36	0.151057	0.299022	PRKAR2B	http://www.reactome.org/cgi-bin/eventbrowser_st_id?ST_ID=R-HSA-111997
Regulation of TP53 Expression and Degradation	Reactome	R-HSA-6806003	1	36	0.151057	0.299022	PPP2CA	http://www.reactome.org/cgi-bin/eventbrowser_st_id?ST_ID=R-HSA-6806003
Protein localization	Reactome	R-HSA-9609507	2	156	0.15447	0.304665	VDAC1|HSD17B4	http://www.reactome.org/cgi-bin/eventbrowser_st_id?ST_ID=R-HSA-9609507
Thyroid cancer	KEGG PATHWAY	hsa05216	1	37	0.154808	0.304665	TCF7	http://www.genome.jp/kegg-bin/show_pathway?hsa05216/hsa:6932%09red
Allograft rejection	KEGG PATHWAY	hsa05330	1	38	0.158542	0.308428	IL4	http://www.genome.jp/kegg-bin/show_pathway?hsa05330/hsa:3565%09red
Gene and protein expression by JAK-STAT signaling after Interleukin-12 stimulation	Reactome	R-HSA-8950505	1	38	0.158542	0.308428	LPL	http://www.reactome.org/cgi-bin/eventbrowser_st_id?ST_ID=R-HSA-8950505
Ca-dependent events	Reactome	R-HSA-111996	1	38	0.158542	0.308428	PRKAR2B	http://www.reactome.org/cgi-bin/eventbrowser_st_id?ST_ID=R-HSA-111996
tRNA charging	BioCyc	TRNA-CHARGING-PWY	1	38	0.158542	0.308428	YARS2	http://biocyc.org/HUMAN/NEW-IMAGE?type=NIL&object=TRNA-CHARGING-PWY
Antigen processing: Ubiquitination & Proteasome degradation	Reactome	R-HSA-983168	3	308	0.159041	0.308513	UBE2B|PJA2|SKP1	http://www.reactome.org/cgi-bin/eventbrowser_st_id?ST_ID=R-HSA-983168
@@Wnt signaling pathway	KEGG PATHWAY	hsa04310	2	160	0.160641	0.310726	TCF7|SKP1	http://www.genome.jp/kegg-bin/show_pathway?hsa04310/hsa:6932%09red/hsa:6500%09red
Generic Transcription Pathway	Reactome	R-HSA-212436	8	1193	0.163166	0.31471	TTC5|TCF7|TAF2|SKP1|PPP2CA|ZNF19|ZNF23|COX11	http://www.reactome.org/cgi-bin/eventbrowser_st_id?ST_ID=R-HSA-212436
Necroptosis	KEGG PATHWAY	hsa04217	2	162	0.163744	0.314928	DNM1L|VDAC1	http://www.genome.jp/kegg-bin/show_pathway?hsa04217/hsa:10059%09red/hsa:7416%09red
Ferroptosis	KEGG PATHWAY	hsa04216	1	40	0.165962	0.316496	FTMT	http://www.genome.jp/kegg-bin/show_pathway?hsa04216/hsa:94033%09red
Negative regulation of MAPK pathway	Reactome	R-HSA-5675221	1	40	0.165962	0.316496	PPP2CA	http://www.reactome.org/cgi-bin/eventbrowser_st_id?ST_ID=R-HSA-5675221
Signaling by SCF-KIT	Reactome	R-HSA-1433557	1	40	0.165962	0.316496	FER	http://www.reactome.org/cgi-bin/eventbrowser_st_id?ST_ID=R-HSA-1433557
Diseases associated with glycosaminoglycan metabolism	Reactome	R-HSA-3560782	1	41	0.169647	0.319715	EXT2	http://www.reactome.org/cgi-bin/eventbrowser_st_id?ST_ID=R-HSA-3560782
protein ubiquitylation	BioCyc	PWY-7511	1	41	0.169647	0.319715	UBE2B	http://biocyc.org/HUMAN/NEW-IMAGE?type=NIL&object=PWY-7511
Integrin signalling pathway	PANTHER	P00034	2	166	0.169981	0.319715	COL14A1|PIK3CG	http://www.pantherdb.org/pathway/pathwayDiagram.jsp?catAccession=P00034
cGMP-PKG signaling pathway	KEGG PATHWAY	hsa04022	2	167	0.171547	0.319715	VDAC1|PIK3CG	http://www.genome.jp/kegg-bin/show_pathway?hsa04022/hsa:7416%09red/hsa:5294%09red
Tryptophan metabolism	KEGG PATHWAY	hsa00380	1	42	0.173317	0.319715	DDC	http://www.genome.jp/kegg-bin/show_pathway?hsa00380/hsa:1644%09red
Glucagon-like Peptide-1 (GLP1) regulates insulin secretion	Reactome	R-HSA-381676	1	42	0.173317	0.319715	PRKAR2B	http://www.reactome.org/cgi-bin/eventbrowser_st_id?ST_ID=R-HSA-381676
tRNA Aminoacylation	Reactome	R-HSA-379724	1	42	0.173317	0.319715	YARS2	http://www.reactome.org/cgi-bin/eventbrowser_st_id?ST_ID=R-HSA-379724
NCAM1 interactions	Reactome	R-HSA-419037	1	42	0.173317	0.319715	GFRA2	http://www.reactome.org/cgi-bin/eventbrowser_st_id?ST_ID=R-HSA-419037
Signaling by FGFR1	Reactome	R-HSA-5654736	1	42	0.173317	0.319715	PPP2CA	http://www.reactome.org/cgi-bin/eventbrowser_st_id?ST_ID=R-HSA-5654736
Deactivation of the beta-catenin transactivating complex	Reactome	R-HSA-3769402	1	42	0.173317	0.319715	TCF7	http://www.reactome.org/cgi-bin/eventbrowser_st_id?ST_ID=R-HSA-3769402
DAG and IP3 signaling	Reactome	R-HSA-1489509	1	42	0.173317	0.319715	PRKAR2B	http://www.reactome.org/cgi-bin/eventbrowser_st_id?ST_ID=R-HSA-1489509
Bile acid and bile salt metabolism	Reactome	R-HSA-194068	1	42	0.173317	0.319715	HSD17B4	http://www.reactome.org/cgi-bin/eventbrowser_st_id?ST_ID=R-HSA-194068
Tight junction	KEGG PATHWAY	hsa04530	2	170	0.176258	0.320344	PPP2CA|HSPA4	http://www.genome.jp/kegg-bin/show_pathway?hsa04530/hsa:5515%09red/hsa:3308%09red
Metabotropic glutamate receptor group II pathway	PANTHER	P00040	1	43	0.17697	0.320344	PRKAR2B	http://www.pantherdb.org/pathway/pathwayDiagram.jsp?catAccession=P00040
Beta2 adrenergic receptor signaling pathway	PANTHER	P04378	1	43	0.17697	0.320344	PRKAR2B	http://www.pantherdb.org/pathway/pathwayDiagram.jsp?catAccession=P04378
Beta1 adrenergic receptor signaling pathway	PANTHER	P04377	1	43	0.17697	0.320344	PRKAR2B	http://www.pantherdb.org/pathway/pathwayDiagram.jsp?catAccession=P04377
Voltage gated Potassium channels	Reactome	R-HSA-1296072	1	43	0.17697	0.320344	KCNG4	http://www.reactome.org/cgi-bin/eventbrowser_st_id?ST_ID=R-HSA-1296072
Vasopressin regulates renal water homeostasis via Aquaporins	Reactome	R-HSA-432040	1	43	0.17697	0.320344	PRKAR2B	http://www.reactome.org/cgi-bin/eventbrowser_st_id?ST_ID=R-HSA-432040
Transport of vitamins, nucleosides, and related molecules	Reactome	R-HSA-425397	1	43	0.17697	0.320344	SLC35C1	http://www.reactome.org/cgi-bin/eventbrowser_st_id?ST_ID=R-HSA-425397
Fatty acid metabolism	Reactome	R-HSA-8978868	2	172	0.17941	0.323894	SLC22A5|HSD17B4	http://www.reactome.org/cgi-bin/eventbrowser_st_id?ST_ID=R-HSA-8978868
Ubiquitin proteasome pathway	PANTHER	P00060	1	44	0.180607	0.324326	UBE2B	http://www.pantherdb.org/pathway/pathwayDiagram.jsp?catAccession=P00060
Collagen chain trimerization	Reactome	R-HSA-8948216	1	44	0.180607	0.324326	COL14A1	http://www.reactome.org/cgi-bin/eventbrowser_st_id?ST_ID=R-HSA-8948216
Signaling by WNT	Reactome	R-HSA-195721	3	329	0.181687	0.325402	PPP2CA|TCF7|SKP1	http://www.reactome.org/cgi-bin/eventbrowser_st_id?ST_ID=R-HSA-195721
Human papillomavirus infection	KEGG PATHWAY	hsa05165	3	330	0.182787	0.325646	PPP2CA|TCF7|ATP6V1B2	http://www.genome.jp/kegg-bin/show_pathway?hsa05165/hsa:526%09red/hsa:6932%09red/hsa:5515%09red
Basal transcription factors	KEGG PATHWAY	hsa03022	1	45	0.184228	0.325646	TAF2	http://www.genome.jp/kegg-bin/show_pathway?hsa03022/hsa:6873%09red
Elastic fibre formation	Reactome	R-HSA-1566948	1	45	0.184228	0.325646	LOX	http://www.reactome.org/cgi-bin/eventbrowser_st_id?ST_ID=R-HSA-1566948
NOTCH1 Intracellular Domain Regulates Transcription	Reactome	R-HSA-2122947	1	45	0.184228	0.325646	SKP1	http://www.reactome.org/cgi-bin/eventbrowser_st_id?ST_ID=R-HSA-2122947
superpathway of tryptophan utilization	BioCyc	PWY66-401	1	45	0.184228	0.325646	DDC	http://biocyc.org/HUMAN/NEW-IMAGE?type=NIL&object=PWY66-401
@@Hedgehog signaling pathway	KEGG PATHWAY	hsa04340	1	47	0.191423	0.330595	KIF3A	http://www.genome.jp/kegg-bin/show_pathway?hsa04340/hsa:11127%09red
Tuberculosis	KEGG PATHWAY	hsa05152	2	179	0.190508	0.330595	LSP1|CTSD	http://www.genome.jp/kegg-bin/show_pathway?hsa05152/hsa:1509%09red/hsa:4046%09red
HIV Transcription Initiation	Reactome	R-HSA-167161	1	47	0.191423	0.330595	TAF2	http://www.reactome.org/cgi-bin/eventbrowser_st_id?ST_ID=R-HSA-167161
RNA Polymerase II Transcription Initiation And Promoter Clearance	Reactome	R-HSA-76042	1	47	0.191423	0.330595	TAF2	http://www.reactome.org/cgi-bin/eventbrowser_st_id?ST_ID=R-HSA-76042
RNA Polymerase II HIV Promoter Escape	Reactome	R-HSA-167162	1	47	0.191423	0.330595	TAF2	http://www.reactome.org/cgi-bin/eventbrowser_st_id?ST_ID=R-HSA-167162
Interleukin-12 signaling	Reactome	R-HSA-9020591	1	47	0.191423	0.330595	LPL	http://www.reactome.org/cgi-bin/eventbrowser_st_id?ST_ID=R-HSA-9020591
RNA Polymerase II Transcription Pre-Initiation And Promoter Opening	Reactome	R-HSA-73779	1	47	0.191423	0.330595	TAF2	http://www.reactome.org/cgi-bin/eventbrowser_st_id?ST_ID=R-HSA-73779
RNA Polymerase II Transcription Initiation	Reactome	R-HSA-75953	1	47	0.191423	0.330595	TAF2	http://www.reactome.org/cgi-bin/eventbrowser_st_id?ST_ID=R-HSA-75953
RNA Polymerase II Promoter Escape	Reactome	R-HSA-73776	1	47	0.191423	0.330595	TAF2	http://www.reactome.org/cgi-bin/eventbrowser_st_id?ST_ID=R-HSA-73776
Amino sugar and nucleotide sugar metabolism	KEGG PATHWAY	hsa00520	1	48	0.194996	0.334209	UGDH	http://www.genome.jp/kegg-bin/show_pathway?hsa00520/hsa:7358%09red
DNA Damage Bypass	Reactome	R-HSA-73893	1	48	0.194996	0.334209	UBE2B	http://www.reactome.org/cgi-bin/eventbrowser_st_id?ST_ID=R-HSA-73893
superpathway of conversion of glucose to acetyl CoA and entry into the TCA cycle	BioCyc	PWY66-407	1	48	0.194996	0.334209	SUCLG1	http://biocyc.org/HUMAN/NEW-IMAGE?type=NIL&object=PWY66-407
Gene expression (Transcription)	Reactome	R-HSA-74160	9	1448	0.196445	0.335755	TTC5|TCF7|TAF2|SKP1|PPP2CA|AFF4|ZNF19|ZNF23|COX11	http://www.reactome.org/cgi-bin/eventbrowser_st_id?ST_ID=R-HSA-74160
mRNA Splicing - Major Pathway	Reactome	R-HSA-72163	2	183	0.196891	0.335755	SF3B3|DDX46	http://www.reactome.org/cgi-bin/eventbrowser_st_id?ST_ID=R-HSA-72163
Cysteine and methionine metabolism	KEGG PATHWAY	hsa00270	1	49	0.198554	0.336053	TAT	http://www.genome.jp/kegg-bin/show_pathway?hsa00270/hsa:6898%09red
Intestinal immune network for IgA production	KEGG PATHWAY	hsa04672	1	49	0.198554	0.336053	IL4	http://www.genome.jp/kegg-bin/show_pathway?hsa04672/hsa:3565%09red
Chondroitin sulfate/dermatan sulfate metabolism	Reactome	R-HSA-1793185	1	49	0.198554	0.336053	CSGALNACT1	http://www.reactome.org/cgi-bin/eventbrowser_st_id?ST_ID=R-HSA-1793185
Ion channel transport	Reactome	R-HSA-983712	2	185	0.200092	0.336993	ATP2C2|ATP6V1B2	http://www.reactome.org/cgi-bin/eventbrowser_st_id?ST_ID=R-HSA-983712
Separation of Sister Chromatids	Reactome	R-HSA-2467813	2	186	0.201695	0.336993	PPP2CA|KIF2B	http://www.reactome.org/cgi-bin/eventbrowser_st_id?ST_ID=R-HSA-2467813
Metabolism of vitamins and cofactors	Reactome	R-HSA-196854	2	186	0.201695	0.336993	RFC1|NAMPT	http://www.reactome.org/cgi-bin/eventbrowser_st_id?ST_ID=R-HSA-196854
Toll receptor signaling pathway	PANTHER	P00054	1	50	0.202096	0.336993	TLR10	http://www.pantherdb.org/pathway/pathwayDiagram.jsp?catAccession=P00054
Vibrio cholerae infection	KEGG PATHWAY	hsa05110	1	50	0.202096	0.336993	ATP6V1B2	http://www.genome.jp/kegg-bin/show_pathway?hsa05110/hsa:526%09red
Cholesterol metabolism	KEGG PATHWAY	hsa04979	1	50	0.202096	0.336993	VDAC1	http://www.genome.jp/kegg-bin/show_pathway?hsa04979/hsa:7416%09red
Vpu mediated degradation of CD4	Reactome	R-HSA-180534	1	51	0.205623	0.341193	SKP1	http://www.reactome.org/cgi-bin/eventbrowser_st_id?ST_ID=R-HSA-180534
Apoptotic execution phase	Reactome	R-HSA-75153	1	51	0.205623	0.341193	DNM1L	http://www.reactome.org/cgi-bin/eventbrowser_st_id?ST_ID=R-HSA-75153
Cell Cycle, Mitotic	Reactome	R-HSA-69278	4	525	0.206592	0.341319	PPP2CA|SKP1|PRKAR2B|KIF2B	http://www.reactome.org/cgi-bin/eventbrowser_st_id?ST_ID=R-HSA-69278
Signaling by PTK6	Reactome	R-HSA-8848021	1	52	0.209134	0.341319	HLF	http://www.reactome.org/cgi-bin/eventbrowser_st_id?ST_ID=R-HSA-8848021
Negative regulation of NOTCH4 signaling	Reactome	R-HSA-9604323	1	52	0.209134	0.341319	SKP1	http://www.reactome.org/cgi-bin/eventbrowser_st_id?ST_ID=R-HSA-9604323
mRNA Splicing - Minor Pathway	Reactome	R-HSA-72165	1	52	0.209134	0.341319	SF3B3	http://www.reactome.org/cgi-bin/eventbrowser_st_id?ST_ID=R-HSA-72165
Aquaporin-mediated transport	Reactome	R-HSA-445717	1	52	0.209134	0.341319	PRKAR2B	http://www.reactome.org/cgi-bin/eventbrowser_st_id?ST_ID=R-HSA-445717
Signaling by Non-Receptor Tyrosine Kinases	Reactome	R-HSA-9006927	1	52	0.209134	0.341319	HLF	http://www.reactome.org/cgi-bin/eventbrowser_st_id?ST_ID=R-HSA-9006927
PI3K-Akt signaling pathway	KEGG PATHWAY	hsa04151	3	354	0.209681	0.341319	PPP2CA|IL4|PIK3CG	http://www.genome.jp/kegg-bin/show_pathway?hsa04151/hsa:5515%09red/hsa:5294%09red/hsa:3565%09red
mRNA Splicing	Reactome	R-HSA-72172	2	191	0.209732	0.341319	SF3B3|DDX46	http://www.reactome.org/cgi-bin/eventbrowser_st_id?ST_ID=R-HSA-72172
Mineral absorption	KEGG PATHWAY	hsa04978	1	53	0.21263	0.34245	SLC26A3	http://www.genome.jp/kegg-bin/show_pathway?hsa04978/hsa:1811%09red
Autoimmune thyroid disease	KEGG PATHWAY	hsa05320	1	53	0.21263	0.34245	IL4	http://www.genome.jp/kegg-bin/show_pathway?hsa05320/hsa:3565%09red
FBXL7 down-regulates AURKA during mitotic entry and in early mitosis	Reactome	R-HSA-8854050	1	53	0.21263	0.34245	SKP1	http://www.reactome.org/cgi-bin/eventbrowser_st_id?ST_ID=R-HSA-8854050
Synthesis of PIPs at the plasma membrane	Reactome	R-HSA-1660499	1	53	0.21263	0.34245	PIK3CG	http://www.reactome.org/cgi-bin/eventbrowser_st_id?ST_ID=R-HSA-1660499
Huntington disease	KEGG PATHWAY	hsa05016	2	193	0.212957	0.34245	VDAC1|UQCRQ	http://www.genome.jp/kegg-bin/show_pathway?hsa05016/hsa:27089%09red/hsa:7416%09red
Mitotic Anaphase	Reactome	R-HSA-68882	2	194	0.21457	0.342758	PPP2CA|KIF2B	http://www.reactome.org/cgi-bin/eventbrowser_st_id?ST_ID=R-HSA-68882
Muscarinic acetylcholine receptor 2 and 4 signaling pathway	PANTHER	P00043	1	54	0.21611	0.342758	PRKAR2B	http://www.pantherdb.org/pathway/pathwayDiagram.jsp?catAccession=P00043
PLC beta mediated events	Reactome	R-HSA-112043	1	54	0.21611	0.342758	PRKAR2B	http://www.reactome.org/cgi-bin/eventbrowser_st_id?ST_ID=R-HSA-112043
SCF-beta-TrCP mediated degradation of Emi1	Reactome	R-HSA-174113	1	54	0.21611	0.342758	SKP1	http://www.reactome.org/cgi-bin/eventbrowser_st_id?ST_ID=R-HSA-174113
Intraflagellar transport	Reactome	R-HSA-5620924	1	54	0.21611	0.342758	KIF3A	http://www.reactome.org/cgi-bin/eventbrowser_st_id?ST_ID=R-HSA-5620924
Mitotic Metaphase and Anaphase	Reactome	R-HSA-2555396	2	195	0.216186	0.342758	PPP2CA|KIF2B	http://www.reactome.org/cgi-bin/eventbrowser_st_id?ST_ID=R-HSA-2555396
Legionellosis	KEGG PATHWAY	hsa05134	1	55	0.219576	0.344103	SAR1B	http://www.genome.jp/kegg-bin/show_pathway?hsa05134/hsa:51128%09red
G-protein mediated events	Reactome	R-HSA-112040	1	55	0.219576	0.344103	PRKAR2B	http://www.reactome.org/cgi-bin/eventbrowser_st_id?ST_ID=R-HSA-112040
Heparan sulfate/heparin (HS-GAG) metabolism	Reactome	R-HSA-1638091	1	55	0.219576	0.344103	EXT2	http://www.reactome.org/cgi-bin/eventbrowser_st_id?ST_ID=R-HSA-1638091
purine nucleotides de novo biosynthesis	BioCyc	PWY-841	1	55	0.219576	0.344103	ATP6V1B2	http://biocyc.org/HUMAN/NEW-IMAGE?type=NIL&object=PWY-841
superpathway of purine nucleotide salvage	BioCyc	PWY66-409	1	55	0.219576	0.344103	ATP6V1B2	http://biocyc.org/HUMAN/NEW-IMAGE?type=NIL&object=PWY66-409
@@Fatty acid metabolism	KEGG PATHWAY	hsa01212	1	57	0.22646	0.345301	HSD17B4	http://www.genome.jp/kegg-bin/show_pathway?hsa01212/hsa:3295%09red
Cilium Assembly	Reactome	R-HSA-5617833	2	200	0.224277	0.345301	PRKAR2B|KIF3A	http://www.reactome.org/cgi-bin/eventbrowser_st_id?ST_ID=R-HSA-5617833
Metabolism of amino acids and derivatives	Reactome	R-HSA-71291	3	367	0.2246	0.345301	TAT|DDC|TH	http://www.reactome.org/cgi-bin/eventbrowser_st_id?ST_ID=R-HSA-71291
Inflammation mediated by chemokine and cytokine signaling pathway	PANTHER	P00031	2	201	0.225898	0.345301	COL14A1|PIK3CG	http://www.pantherdb.org/pathway/pathwayDiagram.jsp?catAccession=P00031
Signaling by NOTCH1 in Cancer	Reactome	R-HSA-2644603	1	57	0.22646	0.345301	SKP1	http://www.reactome.org/cgi-bin/eventbrowser_st_id?ST_ID=R-HSA-2644603
E3 ubiquitin ligases ubiquitinate target proteins	Reactome	R-HSA-8866654	1	57	0.22646	0.345301	UBE2B	http://www.reactome.org/cgi-bin/eventbrowser_st_id?ST_ID=R-HSA-8866654
Constitutive Signaling by NOTCH1 PEST Domain Mutants	Reactome	R-HSA-2644606	1	57	0.22646	0.345301	SKP1	http://www.reactome.org/cgi-bin/eventbrowser_st_id?ST_ID=R-HSA-2644606
Signaling by NOTCH1 PEST Domain Mutants in Cancer	Reactome	R-HSA-2644602	1	57	0.22646	0.345301	SKP1	http://www.reactome.org/cgi-bin/eventbrowser_st_id?ST_ID=R-HSA-2644602
Interleukin-12 family signaling	Reactome	R-HSA-447115	1	57	0.22646	0.345301	LPL	http://www.reactome.org/cgi-bin/eventbrowser_st_id?ST_ID=R-HSA-447115
Signaling by NOTCH1 HD+PEST Domain Mutants in Cancer	Reactome	R-HSA-2894858	1	57	0.22646	0.345301	SKP1	http://www.reactome.org/cgi-bin/eventbrowser_st_id?ST_ID=R-HSA-2894858
Constitutive Signaling by NOTCH1 HD+PEST Domain Mutants	Reactome	R-HSA-2894862	1	57	0.22646	0.345301	SKP1	http://www.reactome.org/cgi-bin/eventbrowser_st_id?ST_ID=R-HSA-2894862
Ion transport by P-type ATPases	Reactome	R-HSA-936837	1	57	0.22646	0.345301	ATP2C2	http://www.reactome.org/cgi-bin/eventbrowser_st_id?ST_ID=R-HSA-936837
NIK-->noncanonical NF-kB signaling	Reactome	R-HSA-5676590	1	58	0.22988	0.348639	SKP1	http://www.reactome.org/cgi-bin/eventbrowser_st_id?ST_ID=R-HSA-5676590
Infectious disease	Reactome	R-HSA-5663205	3	372	0.230394	0.348639	TAF2|CBLL1|SKP1	http://www.reactome.org/cgi-bin/eventbrowser_st_id?ST_ID=R-HSA-5663205
GLI3 is processed to GLI3R by the proteasome	Reactome	R-HSA-5610785	1	59	0.233284	0.348639	SKP1	http://www.reactome.org/cgi-bin/eventbrowser_st_id?ST_ID=R-HSA-5610785
SCF(Skp2)-mediated degradation of p27/p21	Reactome	R-HSA-187577	1	59	0.233284	0.348639	SKP1	http://www.reactome.org/cgi-bin/eventbrowser_st_id?ST_ID=R-HSA-187577
Dectin-1 mediated noncanonical NF-kB signaling	Reactome	R-HSA-5607761	1	59	0.233284	0.348639	SKP1	http://www.reactome.org/cgi-bin/eventbrowser_st_id?ST_ID=R-HSA-5607761
Peroxisomal protein import	Reactome	R-HSA-9033241	1	59	0.233284	0.348639	HSD17B4	http://www.reactome.org/cgi-bin/eventbrowser_st_id?ST_ID=R-HSA-9033241
Degradation of GLI1 by the proteasome	Reactome	R-HSA-5610780	1	59	0.233284	0.348639	SKP1	http://www.reactome.org/cgi-bin/eventbrowser_st_id?ST_ID=R-HSA-5610780
Degradation of GLI2 by the proteasome	Reactome	R-HSA-5610783	1	59	0.233284	0.348639	SKP1	http://www.reactome.org/cgi-bin/eventbrowser_st_id?ST_ID=R-HSA-5610783
NRAGE signals death through JNK	Reactome	R-HSA-193648	1	59	0.233284	0.348639	FGD4	http://www.reactome.org/cgi-bin/eventbrowser_st_id?ST_ID=R-HSA-193648
Long-term depression	KEGG PATHWAY	hsa04730	1	60	0.236674	0.351378	PPP2CA	http://www.genome.jp/kegg-bin/show_pathway?hsa04730/hsa:5515%09red
NCAM signaling for neurite out-growth	Reactome	R-HSA-375165	1	60	0.236674	0.351378	GFRA2	http://www.reactome.org/cgi-bin/eventbrowser_st_id?ST_ID=R-HSA-375165
rRNA modification in the nucleus and cytosol	Reactome	R-HSA-6790901	1	60	0.236674	0.351378	UTP18	http://www.reactome.org/cgi-bin/eventbrowser_st_id?ST_ID=R-HSA-6790901
Muscle contraction	Reactome	R-HSA-397014	2	209	0.238896	0.352523	TNNT3|TNNI2	http://www.reactome.org/cgi-bin/eventbrowser_st_id?ST_ID=R-HSA-397014
B cell activation	PANTHER	P00010	1	61	0.240049	0.352523	PIK3CG	http://www.pantherdb.org/pathway/pathwayDiagram.jsp?catAccession=P00010
Ca2+ pathway	Reactome	R-HSA-4086398	1	61	0.240049	0.352523	TCF7	http://www.reactome.org/cgi-bin/eventbrowser_st_id?ST_ID=R-HSA-4086398
RNA Polymerase II Transcription Elongation	Reactome	R-HSA-75955	1	61	0.240049	0.352523	AFF4	http://www.reactome.org/cgi-bin/eventbrowser_st_id?ST_ID=R-HSA-75955
Formation of RNA Pol II elongation complex	Reactome	R-HSA-112382	1	61	0.240049	0.352523	AFF4	http://www.reactome.org/cgi-bin/eventbrowser_st_id?ST_ID=R-HSA-112382
VEGF signaling pathway	PANTHER	P00056	1	62	0.243409	0.355689	PIK3CG	http://www.pantherdb.org/pathway/pathwayDiagram.jsp?catAccession=P00056
5HT2 type receptor mediated signaling pathway	PANTHER	P04374	1	62	0.243409	0.355689	SLC18A1	http://www.pantherdb.org/pathway/pathwayDiagram.jsp?catAccession=P04374
Phospholipid metabolism	Reactome	R-HSA-1483257	2	212	0.243781	0.355689	VAC14|PIK3CG	http://www.reactome.org/cgi-bin/eventbrowser_st_id?ST_ID=R-HSA-1483257
M Phase	Reactome	R-HSA-68886	3	384	0.244409	0.355839	PPP2CA|PRKAR2B|KIF2B	http://www.reactome.org/cgi-bin/eventbrowser_st_id?ST_ID=R-HSA-68886
Basal cell carcinoma	KEGG PATHWAY	hsa05217	1	63	0.246754	0.357713	TCF7	http://www.genome.jp/kegg-bin/show_pathway?hsa05217/hsa:6932%09red
Synthesis of substrates in N-glycan biosythesis	Reactome	R-HSA-446219	1	63	0.246754	0.357713	SLC35C1	http://www.reactome.org/cgi-bin/eventbrowser_st_id?ST_ID=R-HSA-446219
Mitochondrial protein import	Reactome	R-HSA-1268020	1	64	0.250084	0.361767	VDAC1	http://www.reactome.org/cgi-bin/eventbrowser_st_id?ST_ID=R-HSA-1268020
Metabotropic glutamate receptor group III pathway	PANTHER	P00039	1	65	0.2534	0.363457	PRKAR2B	http://www.pantherdb.org/pathway/pathwayDiagram.jsp?catAccession=P00039
Inflammatory bowel disease (IBD)	KEGG PATHWAY	hsa05321	1	65	0.2534	0.363457	IL4	http://www.genome.jp/kegg-bin/show_pathway?hsa05321/hsa:3565%09red
Costimulation by the CD28 family	Reactome	R-HSA-388841	1	65	0.2534	0.363457	PPP2CA	http://www.reactome.org/cgi-bin/eventbrowser_st_id?ST_ID=R-HSA-388841
Oxygen-dependent proline hydroxylation of Hypoxia-inducible Factor Alpha	Reactome	R-HSA-1234176	1	65	0.2534	0.363457	HLF	http://www.reactome.org/cgi-bin/eventbrowser_st_id?ST_ID=R-HSA-1234176
Acute myeloid leukemia	KEGG PATHWAY	hsa05221	1	66	0.256701	0.36357	TCF7	http://www.genome.jp/kegg-bin/show_pathway?hsa05221/hsa:6932%09red
Aminoacyl-tRNA biosynthesis	KEGG PATHWAY	hsa00970	1	66	0.256701	0.36357	YARS2	http://www.genome.jp/kegg-bin/show_pathway?hsa00970/hsa:51067%09red
Activation of NF-kappaB in B cells	Reactome	R-HSA-1169091	1	66	0.256701	0.36357	SKP1	http://www.reactome.org/cgi-bin/eventbrowser_st_id?ST_ID=R-HSA-1169091
Signaling by FGFR2	Reactome	R-HSA-5654738	1	66	0.256701	0.36357	PPP2CA	http://www.reactome.org/cgi-bin/eventbrowser_st_id?ST_ID=R-HSA-5654738
Glycolysis	Reactome	R-HSA-70171	1	66	0.256701	0.36357	PPP2CA	http://www.reactome.org/cgi-bin/eventbrowser_st_id?ST_ID=R-HSA-70171
Regulation of HSF1-mediated heat shock response	Reactome	R-HSA-3371453	1	66	0.256701	0.36357	HSPA4	http://www.reactome.org/cgi-bin/eventbrowser_st_id?ST_ID=R-HSA-3371453
superpathway of inositol phosphate compounds	BioCyc	PWY-6371	1	67	0.259988	0.367456	PIK3CG	http://biocyc.org/HUMAN/NEW-IMAGE?type=NIL&object=PWY-6371
Fc epsilon RI signaling pathway	KEGG PATHWAY	hsa04664	1	68	0.26326	0.371306	IL4	http://www.genome.jp/kegg-bin/show_pathway?hsa04664/hsa:3565%09red
Renal cell carcinoma	KEGG PATHWAY	hsa05211	1	69	0.266518	0.372711	HLF	http://www.genome.jp/kegg-bin/show_pathway?hsa05211/hsa:2034%09red
Loss of Nlp from mitotic centrosomes	Reactome	R-HSA-380259	1	69	0.266518	0.372711	PRKAR2B	http://www.reactome.org/cgi-bin/eventbrowser_st_id?ST_ID=R-HSA-380259
Loss of proteins required for interphase microtubule organization from the centrosome	Reactome	R-HSA-380284	1	69	0.266518	0.372711	PRKAR2B	http://www.reactome.org/cgi-bin/eventbrowser_st_id?ST_ID=R-HSA-380284
HIV Infection	Reactome	R-HSA-162906	2	227	0.26825	0.372711	TAF2|SKP1	http://www.reactome.org/cgi-bin/eventbrowser_st_id?ST_ID=R-HSA-162906
Ras Pathway	PANTHER	P04393	1	70	0.269761	0.372711	PIK3CG	http://www.pantherdb.org/pathway/pathwayDiagram.jsp?catAccession=P04393
Prolactin signaling pathway	KEGG PATHWAY	hsa04917	1	70	0.269761	0.372711	TH	http://www.genome.jp/kegg-bin/show_pathway?hsa04917/hsa:7054%09red
Epithelial cell signaling in Helicobacter pylori infection	KEGG PATHWAY	hsa05120	1	70	0.269761	0.372711	ATP6V1B2	http://www.genome.jp/kegg-bin/show_pathway?hsa05120/hsa:526%09red
Orc1 removal from chromatin	Reactome	R-HSA-68949	1	70	0.269761	0.372711	SKP1	http://www.reactome.org/cgi-bin/eventbrowser_st_id?ST_ID=R-HSA-68949
Signaling by Insulin receptor	Reactome	R-HSA-74752	1	70	0.269761	0.372711	ATP6V1B2	http://www.reactome.org/cgi-bin/eventbrowser_st_id?ST_ID=R-HSA-74752
Regulation of RUNX2 expression and activity	Reactome	R-HSA-8939902	1	70	0.269761	0.372711	SKP1	http://www.reactome.org/cgi-bin/eventbrowser_st_id?ST_ID=R-HSA-8939902
Signaling by NOTCH1	Reactome	R-HSA-1980143	1	71	0.272991	0.376404	SKP1	http://www.reactome.org/cgi-bin/eventbrowser_st_id?ST_ID=R-HSA-1980143
Thermogenesis	KEGG PATHWAY	hsa04714	2	231	0.274778	0.377277	COX11|UQCRQ	http://www.genome.jp/kegg-bin/show_pathway?hsa04714/hsa:27089%09red/hsa:1353%09red
p53 signaling pathway	KEGG PATHWAY	hsa04115	1	72	0.276206	0.377277	CD82	http://www.genome.jp/kegg-bin/show_pathway?hsa04115/hsa:3732%09red
AURKA Activation by TPX2	Reactome	R-HSA-8854518	1	72	0.276206	0.377277	PRKAR2B	http://www.reactome.org/cgi-bin/eventbrowser_st_id?ST_ID=R-HSA-8854518
TCF dependent signaling in response to WNT	Reactome	R-HSA-201681	2	232	0.276409	0.377277	PPP2CA|TCF7	http://www.reactome.org/cgi-bin/eventbrowser_st_id?ST_ID=R-HSA-201681
Neddylation	Reactome	R-HSA-8951664	2	232	0.276409	0.377277	HLF|SKP1	http://www.reactome.org/cgi-bin/eventbrowser_st_id?ST_ID=R-HSA-8951664
Transcription of the HIV genome	Reactome	R-HSA-167172	1	73	0.279406	0.380197	TAF2	http://www.reactome.org/cgi-bin/eventbrowser_st_id?ST_ID=R-HSA-167172
RAF/MAP kinase cascade	Reactome	R-HSA-5673001	2	234	0.279672	0.380197	PPP2CA|GFRA2	http://www.reactome.org/cgi-bin/eventbrowser_st_id?ST_ID=R-HSA-5673001
Thyroid hormone synthesis	KEGG PATHWAY	hsa04918	1	74	0.282593	0.380349	SLC26A4	http://www.genome.jp/kegg-bin/show_pathway?hsa04918/hsa:5172%09red
Leishmaniasis	KEGG PATHWAY	hsa05140	1	74	0.282593	0.380349	IL4	http://www.genome.jp/kegg-bin/show_pathway?hsa05140/hsa:3565%09red
Inositol phosphate metabolism	KEGG PATHWAY	hsa00562	1	74	0.282593	0.380349	PIK3CG	http://www.genome.jp/kegg-bin/show_pathway?hsa00562/hsa:5294%09red
Bacterial invasion of epithelial cells	KEGG PATHWAY	hsa05100	1	74	0.282593	0.380349	CTNNA2	http://www.genome.jp/kegg-bin/show_pathway?hsa05100/hsa:1496%09red
Cellular response to hypoxia	Reactome	R-HSA-1234174	1	74	0.282593	0.380349	HLF	http://www.reactome.org/cgi-bin/eventbrowser_st_id?ST_ID=R-HSA-1234174
Biosynthesis of amino acids	KEGG PATHWAY	hsa01230	1	75	0.285766	0.383857	TAT	http://www.genome.jp/kegg-bin/show_pathway?hsa01230/hsa:6898%09red
MAPK1/MAPK3 signaling	Reactome	R-HSA-5684996	2	239	0.287824	0.385803	PPP2CA|GFRA2	http://www.reactome.org/cgi-bin/eventbrowser_st_id?ST_ID=R-HSA-5684996
Signaling by NTRK1 (TRKA)	Reactome	R-HSA-187037	1	76	0.288925	0.385803	PPP2CA	http://www.reactome.org/cgi-bin/eventbrowser_st_id?ST_ID=R-HSA-187037
Cell death signalling via NRAGE, NRIF and NADE	Reactome	R-HSA-204998	1	76	0.288925	0.385803	FGD4	http://www.reactome.org/cgi-bin/eventbrowser_st_id?ST_ID=R-HSA-204998
Processing of Capped Intron-Containing Pre-mRNA	Reactome	R-HSA-72203	2	241	0.291083	0.386194	SF3B3|DDX46	http://www.reactome.org/cgi-bin/eventbrowser_st_id?ST_ID=R-HSA-72203
Antigen processing and presentation	KEGG PATHWAY	hsa04612	1	77	0.29207	0.386194	HSPA4	http://www.genome.jp/kegg-bin/show_pathway?hsa04612/hsa:3308%09red
Post NMDA receptor activation events	Reactome	R-HSA-438064	1	77	0.29207	0.386194	PRKAR2B	http://www.reactome.org/cgi-bin/eventbrowser_st_id?ST_ID=R-HSA-438064
Signaling by FGFR	Reactome	R-HSA-190236	1	77	0.29207	0.386194	PPP2CA	http://www.reactome.org/cgi-bin/eventbrowser_st_id?ST_ID=R-HSA-190236
Protein ubiquitination	Reactome	R-HSA-8852135	1	77	0.29207	0.386194	UBE2B	http://www.reactome.org/cgi-bin/eventbrowser_st_id?ST_ID=R-HSA-8852135
T cell activation	PANTHER	P00053	1	78	0.295201	0.388816	PIK3CG	http://www.pantherdb.org/pathway/pathwayDiagram.jsp?catAccession=P00053
Regulation of insulin secretion	Reactome	R-HSA-422356	1	78	0.295201	0.388816	PRKAR2B	http://www.reactome.org/cgi-bin/eventbrowser_st_id?ST_ID=R-HSA-422356
Regulation of APC/C activators between G1/S and early anaphase	Reactome	R-HSA-176408	1	79	0.298319	0.392159	SKP1	http://www.reactome.org/cgi-bin/eventbrowser_st_id?ST_ID=R-HSA-176408
Interleukin signaling pathway	PANTHER	P00036	1	80	0.301422	0.393944	IL4	http://www.pantherdb.org/pathway/pathwayDiagram.jsp?catAccession=P00036
G alpha (12/13) signalling events	Reactome	R-HSA-416482	1	80	0.301422	0.393944	FGD4	http://www.reactome.org/cgi-bin/eventbrowser_st_id?ST_ID=R-HSA-416482
Signaling by NOTCH4	Reactome	R-HSA-9013694	1	80	0.301422	0.393944	SKP1	http://www.reactome.org/cgi-bin/eventbrowser_st_id?ST_ID=R-HSA-9013694
FCERI mediated NF-kB activation	Reactome	R-HSA-2871837	1	81	0.304512	0.395691	SKP1	http://www.reactome.org/cgi-bin/eventbrowser_st_id?ST_ID=R-HSA-2871837
Recruitment of mitotic centrosome proteins and complexes	Reactome	R-HSA-380270	1	81	0.304512	0.395691	PRKAR2B	http://www.reactome.org/cgi-bin/eventbrowser_st_id?ST_ID=R-HSA-380270
Centrosome maturation	Reactome	R-HSA-380287	1	81	0.304512	0.395691	PRKAR2B	http://www.reactome.org/cgi-bin/eventbrowser_st_id?ST_ID=R-HSA-380287
@@Cell Cycle	Reactome	R-HSA-1640170	4	629	0.306286	0.396643	PPP2CA|SKP1|PRKAR2B|KIF2B	http://www.reactome.org/cgi-bin/eventbrowser_st_id?ST_ID=R-HSA-1640170
TP53 Regulates Metabolic Genes	Reactome	R-HSA-5628897	1	82	0.307589	0.396643	COX11	http://www.reactome.org/cgi-bin/eventbrowser_st_id?ST_ID=R-HSA-5628897
Downstream signaling events of B Cell Receptor (BCR)	Reactome	R-HSA-1168372	1	82	0.307589	0.396643	SKP1	http://www.reactome.org/cgi-bin/eventbrowser_st_id?ST_ID=R-HSA-1168372
Cyclin E associated events during G1/S transition	Reactome	R-HSA-69202	1	82	0.307589	0.396643	SKP1	http://www.reactome.org/cgi-bin/eventbrowser_st_id?ST_ID=R-HSA-69202
FLT3 Signaling	Reactome	R-HSA-9607240	2	252	0.308965	0.397661	PPP2CA|GFRA2	http://www.reactome.org/cgi-bin/eventbrowser_st_id?ST_ID=R-HSA-9607240
Peroxisome	KEGG PATHWAY	hsa04146	1	83	0.310652	0.399072	HSD17B4	http://www.genome.jp/kegg-bin/show_pathway?hsa04146/hsa:3295%09red
Cyclin A:Cdk2-associated events at S phase entry	Reactome	R-HSA-69656	1	84	0.313701	0.401466	SKP1	http://www.reactome.org/cgi-bin/eventbrowser_st_id?ST_ID=R-HSA-69656
Hedgehog 'on' state	Reactome	R-HSA-5632684	1	84	0.313701	0.401466	KIF3A	http://www.reactome.org/cgi-bin/eventbrowser_st_id?ST_ID=R-HSA-5632684
Cytokine Signaling in Immune system	Reactome	R-HSA-1280215	5	836	0.314424	0.401633	PPP2CA|IL4|LPL|GFRA2|SKP1	http://www.reactome.org/cgi-bin/eventbrowser_st_id?ST_ID=R-HSA-1280215
Regulation of mitotic cell cycle	Reactome	R-HSA-453276	1	85	0.316737	0.40231	SKP1	http://www.reactome.org/cgi-bin/eventbrowser_st_id?ST_ID=R-HSA-453276
APC/C-mediated degradation of cell cycle proteins	Reactome	R-HSA-174143	1	85	0.316737	0.40231	SKP1	http://www.reactome.org/cgi-bin/eventbrowser_st_id?ST_ID=R-HSA-174143
Glucose metabolism	Reactome	R-HSA-70326	1	85	0.316737	0.40231	PPP2CA	http://www.reactome.org/cgi-bin/eventbrowser_st_id?ST_ID=R-HSA-70326
Cardiac muscle contraction	KEGG PATHWAY	hsa04260	1	86	0.31976	0.403876	UQCRQ	http://www.genome.jp/kegg-bin/show_pathway?hsa04260/hsa:27089%09red
Colorectal cancer	KEGG PATHWAY	hsa05210	1	86	0.31976	0.403876	TCF7	http://www.genome.jp/kegg-bin/show_pathway?hsa05210/hsa:6932%09red
Cellular response to heat stress	Reactome	R-HSA-3371556	1	86	0.31976	0.403876	HSPA4	http://www.reactome.org/cgi-bin/eventbrowser_st_id?ST_ID=R-HSA-3371556
Mitochondrial translation elongation	Reactome	R-HSA-5389840	1	87	0.322769	0.404657	MRPL13	http://www.reactome.org/cgi-bin/eventbrowser_st_id?ST_ID=R-HSA-5389840
Platelet homeostasis	Reactome	R-HSA-418346	1	87	0.322769	0.404657	PPP2CA	http://www.reactome.org/cgi-bin/eventbrowser_st_id?ST_ID=R-HSA-418346
Mitochondrial translation initiation	Reactome	R-HSA-5368286	1	87	0.322769	0.404657	MRPL13	http://www.reactome.org/cgi-bin/eventbrowser_st_id?ST_ID=R-HSA-5368286
Mitochondrial translation termination	Reactome	R-HSA-5419276	1	87	0.322769	0.404657	MRPL13	http://www.reactome.org/cgi-bin/eventbrowser_st_id?ST_ID=R-HSA-5419276
Switching of origins to a post-replicative state	Reactome	R-HSA-69052	1	89	0.328748	0.407624	SKP1	http://www.reactome.org/cgi-bin/eventbrowser_st_id?ST_ID=R-HSA-69052
Peptide hormone metabolism	Reactome	R-HSA-2980736	1	89	0.328748	0.407624	CTSD	http://www.reactome.org/cgi-bin/eventbrowser_st_id?ST_ID=R-HSA-2980736
RAB GEFs exchange GTP for GDP on RABs	Reactome	R-HSA-8876198	1	89	0.328748	0.407624	DENND5B	http://www.reactome.org/cgi-bin/eventbrowser_st_id?ST_ID=R-HSA-8876198
Activation of NMDA receptors and postsynaptic events	Reactome	R-HSA-442755	1	89	0.328748	0.407624	PRKAR2B	http://www.reactome.org/cgi-bin/eventbrowser_st_id?ST_ID=R-HSA-442755
Macroautophagy	Reactome	R-HSA-1632852	1	89	0.328748	0.407624	VDAC1	http://www.reactome.org/cgi-bin/eventbrowser_st_id?ST_ID=R-HSA-1632852
PI5P, PP2A and IER3 Regulate PI3K/AKT Signaling	Reactome	R-HSA-6811558	1	89	0.328748	0.407624	PPP2CA	http://www.reactome.org/cgi-bin/eventbrowser_st_id?ST_ID=R-HSA-6811558
Protein digestion and absorption	KEGG PATHWAY	hsa04974	1	90	0.331718	0.410554	COL14A1	http://www.genome.jp/kegg-bin/show_pathway?hsa04974/hsa:7373%09red
Signaling by Receptor Tyrosine Kinases	Reactome	R-HSA-9006934	3	458	0.332851	0.411205	PPP2CA|ATP6V1B2|FER	http://www.reactome.org/cgi-bin/eventbrowser_st_id?ST_ID=R-HSA-9006934
mRNA surveillance pathway	KEGG PATHWAY	hsa03015	1	91	0.334675	0.411207	PPP2CA	http://www.genome.jp/kegg-bin/show_pathway?hsa03015/hsa:5515%09red
Rheumatoid arthritis	KEGG PATHWAY	hsa05323	1	91	0.334675	0.411207	ATP6V1B2	http://www.genome.jp/kegg-bin/show_pathway?hsa05323/hsa:526%09red
Formation of the beta-catenin:TCF transactivating complex	Reactome	R-HSA-201722	1	91	0.334675	0.411207	TCF7	http://www.reactome.org/cgi-bin/eventbrowser_st_id?ST_ID=R-HSA-201722
Th1 and Th2 cell differentiation	KEGG PATHWAY	hsa04658	1	92	0.337619	0.412577	IL4	http://www.genome.jp/kegg-bin/show_pathway?hsa04658/hsa:3565%09red
Unfolded Protein Response (UPR)	Reactome	R-HSA-381119	1	92	0.337619	0.412577	MBTPS1	http://www.reactome.org/cgi-bin/eventbrowser_st_id?ST_ID=R-HSA-381119
Regulation of TP53 Activity through Phosphorylation	Reactome	R-HSA-6804756	1	92	0.337619	0.412577	TAF2	http://www.reactome.org/cgi-bin/eventbrowser_st_id?ST_ID=R-HSA-6804756
IL-17 signaling pathway	KEGG PATHWAY	hsa04657	1	93	0.340549	0.413176	IL4	http://www.genome.jp/kegg-bin/show_pathway?hsa04657/hsa:3565%09red
Transcriptional regulation by RUNX3	Reactome	R-HSA-8878159	1	93	0.340549	0.413176	TCF7	http://www.reactome.org/cgi-bin/eventbrowser_st_id?ST_ID=R-HSA-8878159
Mitochondrial translation	Reactome	R-HSA-5368287	1	93	0.340549	0.413176	MRPL13	http://www.reactome.org/cgi-bin/eventbrowser_st_id?ST_ID=R-HSA-5368287
Recruitment of NuMA to mitotic centrosomes	Reactome	R-HSA-380320	1	93	0.340549	0.413176	PRKAR2B	http://www.reactome.org/cgi-bin/eventbrowser_st_id?ST_ID=R-HSA-380320
Metabolism of RNA	Reactome	R-HSA-8953854	4	667	0.344136	0.41678	PPP2CA|UTP18|SF3B3|DDX46	http://www.reactome.org/cgi-bin/eventbrowser_st_id?ST_ID=R-HSA-8953854
Other interleukin signaling	Reactome	R-HSA-449836	2	275	0.34603	0.418326	PPP2CA|GFRA2	http://www.reactome.org/cgi-bin/eventbrowser_st_id?ST_ID=R-HSA-449836
Downstream TCR signaling	Reactome	R-HSA-202424	1	96	0.349265	0.419721	SKP1	http://www.reactome.org/cgi-bin/eventbrowser_st_id?ST_ID=R-HSA-202424
Negative regulation of the PI3K/AKT network	Reactome	R-HSA-199418	1	96	0.349265	0.419721	PPP2CA	http://www.reactome.org/cgi-bin/eventbrowser_st_id?ST_ID=R-HSA-199418
MAPK family signaling cascades	Reactome	R-HSA-5683057	2	278	0.350821	0.419721	PPP2CA|GFRA2	http://www.reactome.org/cgi-bin/eventbrowser_st_id?ST_ID=R-HSA-5683057
Hematopoietic cell lineage	KEGG PATHWAY	hsa04640	1	97	0.352144	0.419721	IL4	http://www.genome.jp/kegg-bin/show_pathway?hsa04640/hsa:3565%09red
Prostate cancer	KEGG PATHWAY	hsa05215	1	97	0.352144	0.419721	TCF7	http://www.genome.jp/kegg-bin/show_pathway?hsa05215/hsa:6932%09red
p75 NTR receptor-mediated signalling	Reactome	R-HSA-193704	1	97	0.352144	0.419721	FGD4	http://www.reactome.org/cgi-bin/eventbrowser_st_id?ST_ID=R-HSA-193704
Anchoring of the basal body to the plasma membrane	Reactome	R-HSA-5620912	1	97	0.352144	0.419721	PRKAR2B	http://www.reactome.org/cgi-bin/eventbrowser_st_id?ST_ID=R-HSA-5620912
Signaling by NTRKs	Reactome	R-HSA-166520	1	97	0.352144	0.419721	PPP2CA	http://www.reactome.org/cgi-bin/eventbrowser_st_id?ST_ID=R-HSA-166520
Pancreatic secretion	KEGG PATHWAY	hsa04972	1	98	0.355011	0.422395	SLC26A3	http://www.genome.jp/kegg-bin/show_pathway?hsa04972/hsa:1811%09red
Choline metabolism in cancer	KEGG PATHWAY	hsa05231	1	99	0.357866	0.423558	SLC22A5	http://www.genome.jp/kegg-bin/show_pathway?hsa05231/hsa:6584%09red
Potassium Channels	Reactome	R-HSA-1296071	1	99	0.357866	0.423558	KCNG4	http://www.reactome.org/cgi-bin/eventbrowser_st_id?ST_ID=R-HSA-1296071
CLEC7A (Dectin-1) signaling	Reactome	R-HSA-5607764	1	99	0.357866	0.423558	SKP1	http://www.reactome.org/cgi-bin/eventbrowser_st_id?ST_ID=R-HSA-5607764
TNFR2 non-canonical NF-kB pathway	Reactome	R-HSA-5668541	1	100	0.360707	0.426176	SKP1	http://www.reactome.org/cgi-bin/eventbrowser_st_id?ST_ID=R-HSA-5668541
Melanogenesis	KEGG PATHWAY	hsa04916	1	101	0.363537	0.427282	TCF7	http://www.genome.jp/kegg-bin/show_pathway?hsa04916/hsa:6932%09red
Interleukin-1 signaling	Reactome	R-HSA-9020702	1	101	0.363537	0.427282	SKP1	http://www.reactome.org/cgi-bin/eventbrowser_st_id?ST_ID=R-HSA-9020702
Signaling by TGF-beta family members	Reactome	R-HSA-9006936	1	101	0.363537	0.427282	NOG	http://www.reactome.org/cgi-bin/eventbrowser_st_id?ST_ID=R-HSA-9006936
Intracellular signaling by second messengers	Reactome	R-HSA-9006925	2	288	0.366703	0.430154	PPP2CA|PRKAR2B	http://www.reactome.org/cgi-bin/eventbrowser_st_id?ST_ID=R-HSA-9006925
Cell Cycle Checkpoints	Reactome	R-HSA-69620	2	289	0.368283	0.430154	PPP2CA|KIF2B	http://www.reactome.org/cgi-bin/eventbrowser_st_id?ST_ID=R-HSA-69620
Chagas disease (American trypanosomiasis)	KEGG PATHWAY	hsa05142	1	103	0.369158	0.430154	PPP2CA	http://www.genome.jp/kegg-bin/show_pathway?hsa05142/hsa:5515%09red
T cell receptor signaling pathway	KEGG PATHWAY	hsa04660	1	103	0.369158	0.430154	IL4	http://www.genome.jp/kegg-bin/show_pathway?hsa04660/hsa:3565%09red
Diseases of metabolism	Reactome	R-HSA-5668914	1	103	0.369158	0.430154	SFTPC	http://www.reactome.org/cgi-bin/eventbrowser_st_id?ST_ID=R-HSA-5668914
Translation	Reactome	R-HSA-72766	2	291	0.371438	0.431921	YARS2|MRPL13	http://www.reactome.org/cgi-bin/eventbrowser_st_id?ST_ID=R-HSA-72766
C-type lectin receptor signaling pathway	KEGG PATHWAY	hsa04625	1	104	0.37195	0.431921	LSP1	http://www.genome.jp/kegg-bin/show_pathway?hsa04625/hsa:4046%09red
Ribosome biogenesis in eukaryotes	KEGG PATHWAY	hsa03008	1	105	0.374729	0.433661	UTP18	http://www.genome.jp/kegg-bin/show_pathway?hsa03008/hsa:51096%09red
Cargo recognition for clathrin-mediated endocytosis	Reactome	R-HSA-8856825	1	105	0.374729	0.433661	SYT8	http://www.reactome.org/cgi-bin/eventbrowser_st_id?ST_ID=R-HSA-8856825
Cytokine-cytokine receptor interaction	KEGG PATHWAY	hsa04060	2	294	0.37616	0.433834	IL4|GDF9	http://www.genome.jp/kegg-bin/show_pathway?hsa04060/hsa:2661%09red/hsa:3565%09red
Organelle biogenesis and maintenance	Reactome	R-HSA-1852241	2	294	0.37616	0.433834	PRKAR2B|KIF3A	http://www.reactome.org/cgi-bin/eventbrowser_st_id?ST_ID=R-HSA-1852241
Th17 cell differentiation	KEGG PATHWAY	hsa04659	1	107	0.380252	0.437248	IL4	http://www.genome.jp/kegg-bin/show_pathway?hsa04659/hsa:3565%09red
Apoptosis signaling pathway	PANTHER	P00006	1	108	0.382996	0.437248	PIK3CG	http://www.pantherdb.org/pathway/pathwayDiagram.jsp?catAccession=P00006
Phase II - Conjugation of compounds	Reactome	R-HSA-156580	1	108	0.382996	0.437248	UGDH	http://www.reactome.org/cgi-bin/eventbrowser_st_id?ST_ID=R-HSA-156580
Autophagy	Reactome	R-HSA-9612973	1	108	0.382996	0.437248	VDAC1	http://www.reactome.org/cgi-bin/eventbrowser_st_id?ST_ID=R-HSA-9612973
Post-translational protein phosphorylation	Reactome	R-HSA-8957275	1	108	0.382996	0.437248	MBTPS1	http://www.reactome.org/cgi-bin/eventbrowser_st_id?ST_ID=R-HSA-8957275
Interleukin-4 and Interleukin-13 signaling	Reactome	R-HSA-6785807	1	108	0.382996	0.437248	IL4	http://www.reactome.org/cgi-bin/eventbrowser_st_id?ST_ID=R-HSA-6785807
Amyloid fiber formation	Reactome	R-HSA-977225	1	109	0.385727	0.439625	SNCAIP	http://www.reactome.org/cgi-bin/eventbrowser_st_id?ST_ID=R-HSA-977225
Signaling by the B Cell Receptor (BCR)	Reactome	R-HSA-983705	1	110	0.388446	0.44198	SKP1	http://www.reactome.org/cgi-bin/eventbrowser_st_id?ST_ID=R-HSA-983705
Alzheimer disease-presenilin pathway	PANTHER	P00004	1	112	0.393848	0.445878	CTNNA2	http://www.pantherdb.org/pathway/pathwayDiagram.jsp?catAccession=P00004
Cholinergic synapse	KEGG PATHWAY	hsa04725	1	112	0.393848	0.445878	PIK3CG	http://www.genome.jp/kegg-bin/show_pathway?hsa04725/hsa:5294%09red
TNF signaling pathway	KEGG PATHWAY	hsa04668	1	112	0.393848	0.445878	DNM1L	http://www.genome.jp/kegg-bin/show_pathway?hsa04668/hsa:10059%09red
Toxoplasmosis	KEGG PATHWAY	hsa05145	1	113	0.396532	0.448167	PIK3CG	http://www.genome.jp/kegg-bin/show_pathway?hsa05145/hsa:5294%09red
Nonsense Mediated Decay (NMD) enhanced by the Exon Junction Complex (EJC)	Reactome	R-HSA-975957	1	115	0.401863	0.452356	PPP2CA	http://www.reactome.org/cgi-bin/eventbrowser_st_id?ST_ID=R-HSA-975957
Nonsense-Mediated Decay (NMD)	Reactome	R-HSA-927802	1	115	0.401863	0.452356	PPP2CA	http://www.reactome.org/cgi-bin/eventbrowser_st_id?ST_ID=R-HSA-927802
Cellular responses to external stimuli	Reactome	R-HSA-8953897	3	516	0.402243	0.452356	HLF|VDAC1|HSPA4	http://www.reactome.org/cgi-bin/eventbrowser_st_id?ST_ID=R-HSA-8953897
Carbon metabolism	KEGG PATHWAY	hsa01200	1	117	0.407148	0.456356	SUCLG1	http://www.genome.jp/kegg-bin/show_pathway?hsa01200/hsa:8802%09red
TCR signaling	Reactome	R-HSA-202403	1	117	0.407148	0.456356	SKP1	http://www.reactome.org/cgi-bin/eventbrowser_st_id?ST_ID=R-HSA-202403
Synthesis of DNA	Reactome	R-HSA-69239	1	118	0.409772	0.457782	SKP1	http://www.reactome.org/cgi-bin/eventbrowser_st_id?ST_ID=R-HSA-69239
Transcriptional regulation by RUNX2	Reactome	R-HSA-8878166	1	118	0.409772	0.457782	SKP1	http://www.reactome.org/cgi-bin/eventbrowser_st_id?ST_ID=R-HSA-8878166
RHO GTPase Effectors	Reactome	R-HSA-195258	2	321	0.417957	0.466157	PPP2CA|KIF2B	http://www.reactome.org/cgi-bin/eventbrowser_st_id?ST_ID=R-HSA-195258
Lysosome	KEGG PATHWAY	hsa04142	1	123	0.422724	0.469155	CTSD	http://www.genome.jp/kegg-bin/show_pathway?hsa04142/hsa:1509%09red
Rab regulation of trafficking	Reactome	R-HSA-9007101	1	123	0.422724	0.469155	DENND5B	http://www.reactome.org/cgi-bin/eventbrowser_st_id?ST_ID=R-HSA-9007101
Host Interactions of HIV factors	Reactome	R-HSA-162909	1	123	0.422724	0.469155	SKP1	http://www.reactome.org/cgi-bin/eventbrowser_st_id?ST_ID=R-HSA-162909
PDGF signaling pathway	PANTHER	P00047	1	124	0.425281	0.470449	PIK3CG	http://www.pantherdb.org/pathway/pathwayDiagram.jsp?catAccession=P00047
Platelet activation	KEGG PATHWAY	hsa04611	1	124	0.425281	0.470449	PIK3CG	http://www.genome.jp/kegg-bin/show_pathway?hsa04611/hsa:5294%09red
Regulation of Insulin-like Growth Factor (IGF) transport and uptake by Insulin-like Growth Factor Binding Proteins (IGFBPs)	Reactome	R-HSA-381426	1	125	0.427826	0.472493	MBTPS1	http://www.reactome.org/cgi-bin/eventbrowser_st_id?ST_ID=R-HSA-381426
DNA Replication	Reactome	R-HSA-69306	1	126	0.430359	0.474517	SKP1	http://www.reactome.org/cgi-bin/eventbrowser_st_id?ST_ID=R-HSA-69306
Fc epsilon receptor (FCERI) signaling	Reactome	R-HSA-2454202	1	130	0.440384	0.48478	SKP1	http://www.reactome.org/cgi-bin/eventbrowser_st_id?ST_ID=R-HSA-2454202
Mitotic Prophase	Reactome	R-HSA-68875	1	134	0.450232	0.494817	PPP2CA	http://www.reactome.org/cgi-bin/eventbrowser_st_id?ST_ID=R-HSA-68875
Cell surface interactions at the vascular wall	Reactome	R-HSA-202733	1	135	0.452667	0.496687	DOK2	http://www.reactome.org/cgi-bin/eventbrowser_st_id?ST_ID=R-HSA-202733
Apoptosis	KEGG PATHWAY	hsa04210	1	136	0.455092	0.497734	CTSD	http://www.genome.jp/kegg-bin/show_pathway?hsa04210/hsa:1509%09red
Late Phase of HIV Life Cycle	Reactome	R-HSA-162599	1	136	0.455092	0.497734	TAF2	http://www.reactome.org/cgi-bin/eventbrowser_st_id?ST_ID=R-HSA-162599
Insulin signaling pathway	KEGG PATHWAY	hsa04910	1	137	0.457506	0.498762	PRKAR2B	http://www.genome.jp/kegg-bin/show_pathway?hsa04910/hsa:5577%09red
Apelin signaling pathway	KEGG PATHWAY	hsa04371	1	137	0.457506	0.498762	PIK3CG	http://www.genome.jp/kegg-bin/show_pathway?hsa04371/hsa:5294%09red
Estrogen signaling pathway	KEGG PATHWAY	hsa04915	1	138	0.459909	0.500576	CTSD	http://www.genome.jp/kegg-bin/show_pathway?hsa04915/hsa:1509%09red
Signaling pathways regulating pluripotency of stem cells	KEGG PATHWAY	hsa04550	1	140	0.464683	0.503345	TCF7	http://www.genome.jp/kegg-bin/show_pathway?hsa04550/hsa:6932%09red
C-type lectin receptors (CLRs)	Reactome	R-HSA-5621481	1	140	0.464683	0.503345	SKP1	http://www.reactome.org/cgi-bin/eventbrowser_st_id?ST_ID=R-HSA-5621481
Death Receptor Signalling	Reactome	R-HSA-73887	1	140	0.464683	0.503345	FGD4	http://www.reactome.org/cgi-bin/eventbrowser_st_id?ST_ID=R-HSA-73887
HATs acetylate histones	Reactome	R-HSA-3214847	1	142	0.469416	0.507659	JADE2	http://www.reactome.org/cgi-bin/eventbrowser_st_id?ST_ID=R-HSA-3214847
Diseases of glycosylation	Reactome	R-HSA-3781865	1	143	0.471766	0.509387	EXT2	http://www.reactome.org/cgi-bin/eventbrowser_st_id?ST_ID=R-HSA-3781865
Beta-catenin independent WNT signaling	Reactome	R-HSA-3858494	1	144	0.474107	0.511099	TCF7	http://www.reactome.org/cgi-bin/eventbrowser_st_id?ST_ID=R-HSA-3858494
Clathrin-mediated endocytosis	Reactome	R-HSA-8856828	1	145	0.476437	0.512794	SYT8	http://www.reactome.org/cgi-bin/eventbrowser_st_id?ST_ID=R-HSA-8856828
Cell adhesion molecules (CAMs)	KEGG PATHWAY	hsa04514	1	146	0.478756	0.514473	NLGN1	http://www.genome.jp/kegg-bin/show_pathway?hsa04514/hsa:22871%09red
Breast cancer	KEGG PATHWAY	hsa05224	1	147	0.481066	0.516136	TCF7	http://www.genome.jp/kegg-bin/show_pathway?hsa05224/hsa:6932%09red
Phospholipase D signaling pathway	KEGG PATHWAY	hsa04072	1	148	0.483365	0.517776	PIK3CG	http://www.genome.jp/kegg-bin/show_pathway?hsa04072/hsa:5294%09red
Non-alcoholic fatty liver disease (NAFLD)	KEGG PATHWAY	hsa04932	1	149	0.485654	0.517776	UQCRQ	http://www.genome.jp/kegg-bin/show_pathway?hsa04932/hsa:27089%09red
Estrogen-dependent gene expression	Reactome	R-HSA-9018519	1	149	0.485654	0.517776	CTSD	http://www.reactome.org/cgi-bin/eventbrowser_st_id?ST_ID=R-HSA-9018519
HIV Life Cycle	Reactome	R-HSA-162587	1	149	0.485654	0.517776	TAF2	http://www.reactome.org/cgi-bin/eventbrowser_st_id?ST_ID=R-HSA-162587
Phagosome	KEGG PATHWAY	hsa04145	1	152	0.492462	0.524208	ATP6V1B2	http://www.genome.jp/kegg-bin/show_pathway?hsa04145/hsa:526%09red
Ribosome	KEGG PATHWAY	hsa03010	1	153	0.494711	0.524952	MRPL13	http://www.genome.jp/kegg-bin/show_pathway?hsa03010/hsa:28998%09red
Oxytocin signaling pathway	KEGG PATHWAY	hsa04921	1	153	0.494711	0.524952	PIK3CG	http://www.genome.jp/kegg-bin/show_pathway?hsa04921/hsa:5294%09red
Diseases of signal transduction	Reactome	R-HSA-5663202	2	374	0.495606	0.525078	PPP2CA|SKP1	http://www.reactome.org/cgi-bin/eventbrowser_st_id?ST_ID=R-HSA-5663202
Heterotrimeric G-protein signaling pathway-Gi alpha and Gs alpha mediated pathway	PANTHER	P00026	1	154	0.49695	0.52568	PRKAR2B	http://www.pantherdb.org/pathway/pathwayDiagram.jsp?catAccession=P00026
Hepatitis C	KEGG PATHWAY	hsa05160	1	155	0.499179	0.526393	PPP2CA	http://www.genome.jp/kegg-bin/show_pathway?hsa05160/hsa:5515%09red
Cushing syndrome	KEGG PATHWAY	hsa04934	1	155	0.499179	0.526393	TCF7	http://www.genome.jp/kegg-bin/show_pathway?hsa04934/hsa:6932%09red
Cellular senescence	KEGG PATHWAY	hsa04218	1	160	0.51018	0.536322	VDAC1	http://www.genome.jp/kegg-bin/show_pathway?hsa04218/hsa:7416%09red
S Phase	Reactome	R-HSA-69242	1	160	0.51018	0.536322	SKP1	http://www.reactome.org/cgi-bin/eventbrowser_st_id?ST_ID=R-HSA-69242
Jak-STAT signaling pathway	KEGG PATHWAY	hsa04630	1	162	0.514512	0.540038	IL4	http://www.genome.jp/kegg-bin/show_pathway?hsa04630/hsa:3565%09red
Influenza A	KEGG PATHWAY	hsa05164	1	167	0.525177	0.550379	VDAC1	http://www.genome.jp/kegg-bin/show_pathway?hsa05164/hsa:7416%09red
Hepatocellular carcinoma	KEGG PATHWAY	hsa05225	1	168	0.527282	0.551731	TCF7	http://www.genome.jp/kegg-bin/show_pathway?hsa05225/hsa:6932%09red
Alzheimer disease	KEGG PATHWAY	hsa05010	1	171	0.533542	0.557419	UQCRQ	http://www.genome.jp/kegg-bin/show_pathway?hsa05010/hsa:27089%09red
@@Apoptosis	Reactome	R-HSA-109581	1	172	0.53561	0.558718	DNM1L	http://www.reactome.org/cgi-bin/eventbrowser_st_id?ST_ID=R-HSA-109581
G alpha (i) signalling events	Reactome	R-HSA-418594	2	405	0.537901	0.560245	PPP2CA|PRKAR2B	http://www.reactome.org/cgi-bin/eventbrowser_st_id?ST_ID=R-HSA-418594
Programmed Cell Death	Reactome	R-HSA-5357801	1	175	0.541759	0.563397	DNM1L	http://www.reactome.org/cgi-bin/eventbrowser_st_id?ST_ID=R-HSA-5357801
Major pathway of rRNA processing in the nucleolus and cytosol	Reactome	R-HSA-6791226	1	183	0.557766	0.579152	UTP18	http://www.reactome.org/cgi-bin/eventbrowser_st_id?ST_ID=R-HSA-6791226
Cellular responses to stress	Reactome	R-HSA-2262752	2	422	0.560044	0.580628	HLF|HSPA4	http://www.reactome.org/cgi-bin/eventbrowser_st_id?ST_ID=R-HSA-2262752
Transcriptional misregulation in cancer	KEGG PATHWAY	hsa05202	1	186	0.563624	0.582554	KLF3	http://www.genome.jp/kegg-bin/show_pathway?hsa05202/hsa:51274%09red
Kaposi sarcoma-associated herpesvirus infection	KEGG PATHWAY	hsa05167	1	186	0.563624	0.582554	PIK3CG	http://www.genome.jp/kegg-bin/show_pathway?hsa05167/hsa:5294%09red
Chemokine signaling pathway	KEGG PATHWAY	hsa04062	1	190	0.571314	0.589603	PIK3CG	http://www.genome.jp/kegg-bin/show_pathway?hsa04062/hsa:5294%09red
Calcium signaling pathway	KEGG PATHWAY	hsa04020	1	193	0.576994	0.593655	VDAC1	http://www.genome.jp/kegg-bin/show_pathway?hsa04020/hsa:7416%09red
rRNA processing in the nucleus and cytosol	Reactome	R-HSA-8868773	1	193	0.576994	0.593655	UTP18	http://www.reactome.org/cgi-bin/eventbrowser_st_id?ST_ID=R-HSA-8868773
Neurotransmitter receptors and postsynaptic signal transmission	Reactome	R-HSA-112314	1	197	0.58445	0.600414	PRKAR2B	http://www.reactome.org/cgi-bin/eventbrowser_st_id?ST_ID=R-HSA-112314
Viral carcinogenesis	KEGG PATHWAY	hsa05203	1	201	0.591776	0.607019	VAC14	http://www.genome.jp/kegg-bin/show_pathway?hsa05203/hsa:55697%09red
rRNA processing	Reactome	R-HSA-72312	1	203	0.59539	0.609802	UTP18	http://www.reactome.org/cgi-bin/eventbrowser_st_id?ST_ID=R-HSA-72312
Human immunodeficiency virus 1 infection	KEGG PATHWAY	hsa05170	1	212	0.611266	0.625117	SKP1	http://www.genome.jp/kegg-bin/show_pathway?hsa05170/hsa:6500%09red
Ub-specific processing proteases	Reactome	R-HSA-5689880	1	219	0.623184	0.636344	VDAC1	http://www.reactome.org/cgi-bin/eventbrowser_st_id?ST_ID=R-HSA-5689880
Biological oxidations	Reactome	R-HSA-211859	1	220	0.624857	0.637091	UGDH	http://www.reactome.org/cgi-bin/eventbrowser_st_id?ST_ID=R-HSA-211859
ESR-mediated signaling	Reactome	R-HSA-8939211	1	221	0.626522	0.637828	CTSD	http://www.reactome.org/cgi-bin/eventbrowser_st_id?ST_ID=R-HSA-8939211
Signaling by NOTCH	Reactome	R-HSA-157118	1	231	0.642776	0.652799	SKP1	http://www.reactome.org/cgi-bin/eventbrowser_st_id?ST_ID=R-HSA-157118
Herpes simplex virus 1 infection	KEGG PATHWAY	hsa05168	2	492	0.643156	0.652799	ZNF19|ZNF23	http://www.genome.jp/kegg-bin/show_pathway?hsa05168/hsa:7567%09red/hsa:7571%09red
PIP3 activates AKT signaling	Reactome	R-HSA-1257604	1	247	0.667332	0.676323	PPP2CA	http://www.reactome.org/cgi-bin/eventbrowser_st_id?ST_ID=R-HSA-1257604
Platelet activation, signaling and aggregation	Reactome	R-HSA-76002	1	260	0.686042	0.694246	PIK3CG	http://www.reactome.org/cgi-bin/eventbrowser_st_id?ST_ID=R-HSA-76002
Transmission across Chemical Synapses	Reactome	R-HSA-112315	1	261	0.687437	0.69462	PRKAR2B	http://www.reactome.org/cgi-bin/eventbrowser_st_id?ST_ID=R-HSA-112315
Signaling by Nuclear Receptors	Reactome	R-HSA-9006931	1	264	0.691586	0.69777	CTSD	http://www.reactome.org/cgi-bin/eventbrowser_st_id?ST_ID=R-HSA-9006931
Axon guidance	Reactome	R-HSA-422475	2	549	0.701338	0.706556	DOK2|GFRA2	http://www.reactome.org/cgi-bin/eventbrowser_st_id?ST_ID=R-HSA-422475
Chromatin organization	Reactome	R-HSA-4839726	1	273	0.703706	0.706838	JADE2	http://www.reactome.org/cgi-bin/eventbrowser_st_id?ST_ID=R-HSA-4839726
Chromatin modifying enzymes	Reactome	R-HSA-3247509	1	273	0.703706	0.706838	JADE2	http://www.reactome.org/cgi-bin/eventbrowser_st_id?ST_ID=R-HSA-3247509
Deubiquitination	Reactome	R-HSA-5688426	1	296	0.73257	0.73474	VDAC1	http://www.reactome.org/cgi-bin/eventbrowser_st_id?ST_ID=R-HSA-5688426
DNA Repair	Reactome	R-HSA-73894	1	331	0.771217	0.772358	UBE2B	http://www.reactome.org/cgi-bin/eventbrowser_st_id?ST_ID=R-HSA-73894
Neutrophil degranulation	Reactome	R-HSA-6798695	1	478	0.881409	0.881409	CTSD	http://www.reactome.org/cgi-bin/eventbrowser_st_id?ST_ID=R-HSA-6798695

## Sheet: Table_S3
Table S3. Results of the linear model considering normalized AAO as outcome and adjusted-PRS for each condition as predictors. Values were used to create the Figure 2.
Phenotype	estimate	sd_estimate	Radj	Radj_modified	pvalue	pvalue_fdr
ADHD	-0.158879661407018	0.061662810951359	0.00119678230368969	-0.00119678230368969	0.0100082828091055	0.0456497588526341
ASD	-0.0914405698903506	0.0635541587511042	0.000227337426694008	-0.000227337426694008	0.15027885803416	0.214684082905943
BD	-0.273691056616055	0.118148250781793	0.000926933685431064	-0.000926933685431064	0.0205734402590937	0.0514336006477342
EA	-0.0262472433750632	0.0827043454807586	-0.000191128991357203	-0.000191128991357203	0.750982773105906	0.882763395940152
MDD	0.0491748412954087	0.445584097272697	-0.000209950695855499	0.000209950695855499	0.912128260647615	0.912128260647615
Neu	-0.190504477654889	0.104475867267219	0.000493784659235441	-0.000493784659235441	0.068301638836194	0.136603277672388
SCZ	-0.109112863967693	0.040314097823401	0.00134233354300928	-0.00134233354300928	0.00682279237313687	0.0456497588526341
CM	-0.421337588958813	0.170852155247499	0.00107865312363853	-0.00107865312363853	0.0136949276557902	0.0456497588526341
OCD	-0.00869222196536602	0.0333670464066635	-0.000198113633291364	-0.000198113633291364	0.794487056346137	0.882763395940152
CUD	-0.304621259005449	0.192055384730452	0.000321985065535269	-0.000321985065535269	0.112781213342369	0.187968688903949

## Sheet: Sheet1
Table S4. Genomic risk loci for AAO identified in the combined GWAS. Positions are based on Human Genome version 19 (hg19), build 37. Number of SNPs in the genomic locus (r2 ≥ 0.6 with any of the independent significant SNPs).
Genomic Locus	Position	Lead SNP	Lead SNP Position	P-value	nSNPsb	Genes
1	4:38573143-38604331	rs73808504	38600593	8.524e-06	12	RELL1, TBC1D1, PTTG2, AC021860.1, KLF3, TLR10
2	5:133457000-133774168	rs4431386	133557876	2.208e-06	9	SLC22A5, C5orf56, IL4, KIF3A, CCNI2, GDF9, UQCRQ, LEAP2, AFF4, HSPA4, C5orf15, VDAC1, TCF7, SKP1, CTD-2410N18.5, PPP2CA, CDKL3, UBE2B, CDKN2AIPNL, JADE2, SAR1B, SEC24A, DDX46, C5orf24, PCBD2
3	8:20289797-20370404	rs12550821	20315601	1.425e-06	31	CSGALNACT1, LPL, SLC18A1, ATP6V1B2, LZTS1, GFRA2, DOK2, XPO7, LGI3, SFTPC, BMP1
4	8:39181412-39473050	rs7461947	39219286	6.534e-06	63	HTRA4, ADAM9, ADAM32, ADAM18, ADAM2, IDO1, IDO2, C8orf4, ZMAT4
5	8:96882858-96896725	rs75514078	96895035	7.961e-06	5	C8orf37, GDF6
6	8:121006828-121262332	rs10808509, rs6986597	121227216, 121010615	0,000008268, 0,000009374	76	TAF2, DSCC1, DEPTOR, COL14A1, MRPL13, MTBP, SNTB1
7	11:41616152-41700678	rs79109480	41644201	8.48e-06	19	LRRC4C, API5, TTC17
8	11:88395396-88791508	rs35809536	88451538	8.118e-06	10	FZD4, TMEM135, RAB38, GRM5, TYR, NOX4, TRIM49C
9	11:128524088-128524088	rs57801753	128524088	9.464e-06	1	PUS3, DDX25, RPUSD4, FAM118B, SRPR, FOXRED1, TIRAP, ST3GAL4, KIRREL3, FLI1, KCNJ1
10	13:61356260-61390956	rs9570366	61377708	1.404e-06	19	PCDH20
11	16:71388416-71388416	rs142248381	71388416	6.093e-07	1	COG4, SF3B3, MTSS1L, VAC14, CMTR2, CALB2, ZNF23, ZNF19, TAT, HP, HPR
12	16:84322649-84322649	rs11645108	84322649	3.691e-06	1	HSDL1, DNAAF1, KCNG4, WFDC1, ATP2C2
